# Supplementary figures and images for: Solid Rocket Propellant Photo-Polymerization with an In-House LED-UV Prototype
Source: MDPI journal article supplement (doi:10.3390/polym15071633), 2023-03-24

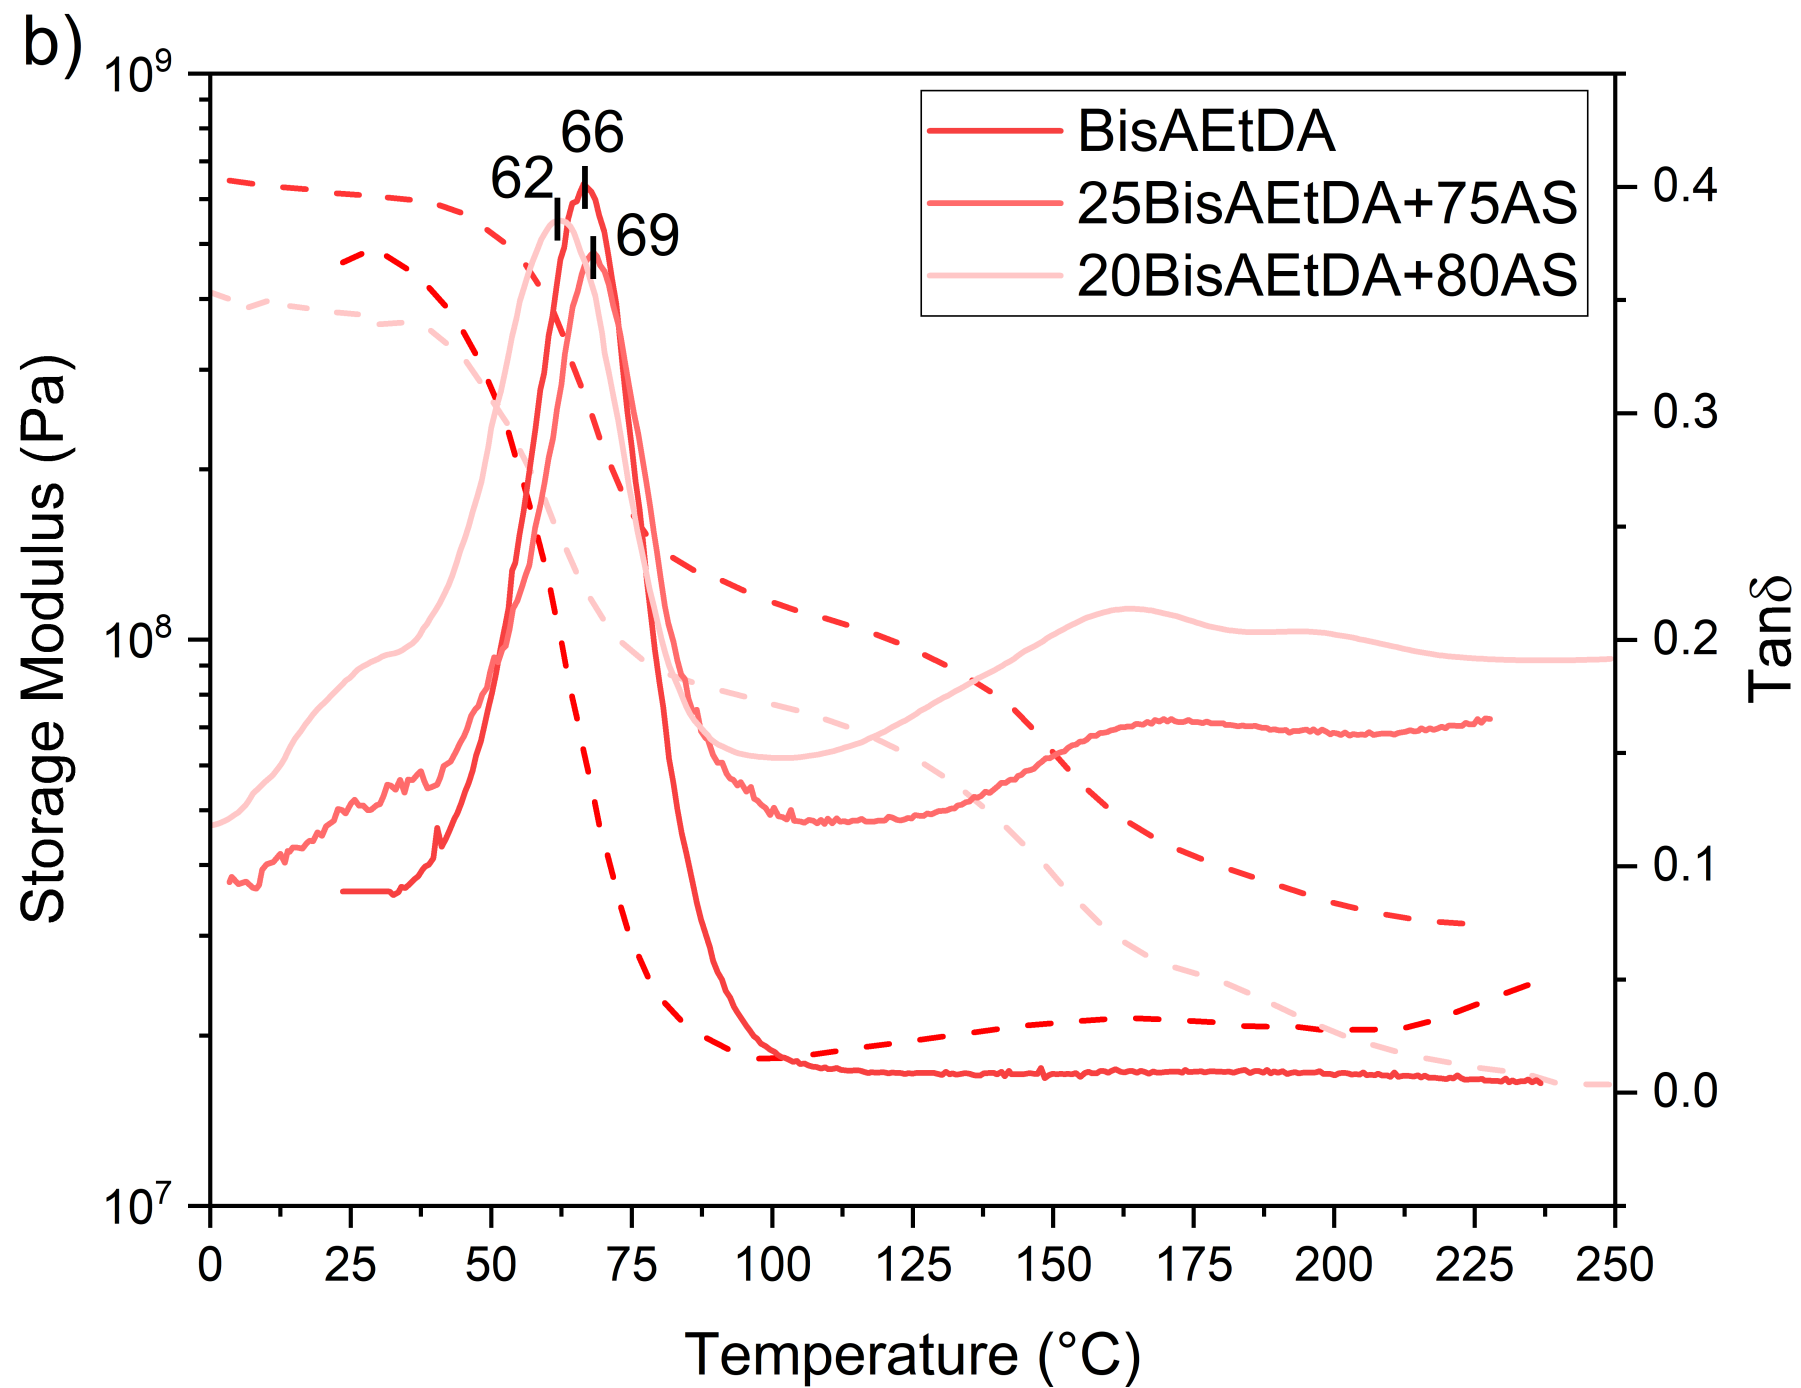

Supplement: s1 [file s1]

e)

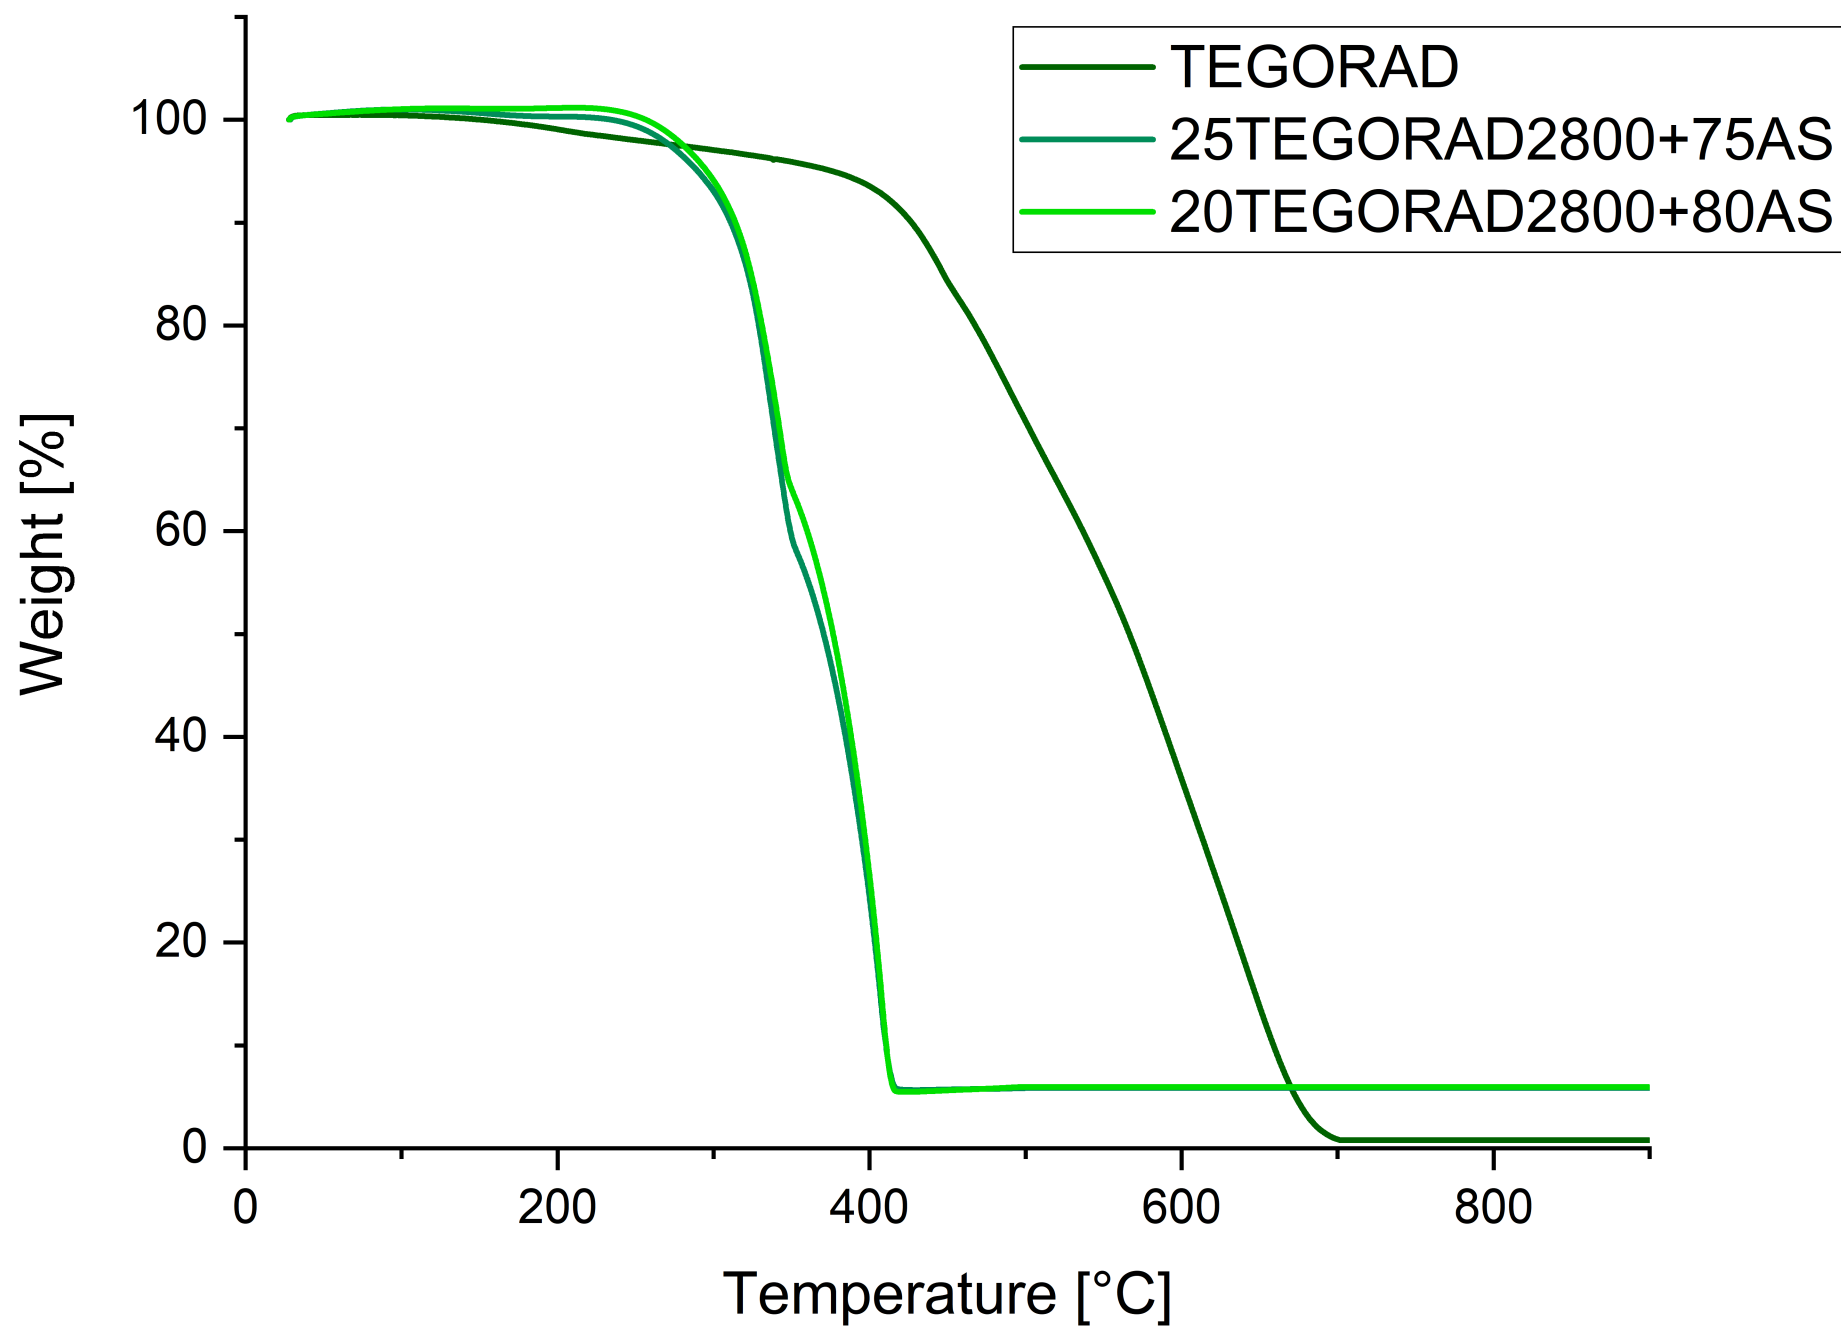

Supplement: s1 [file s1]

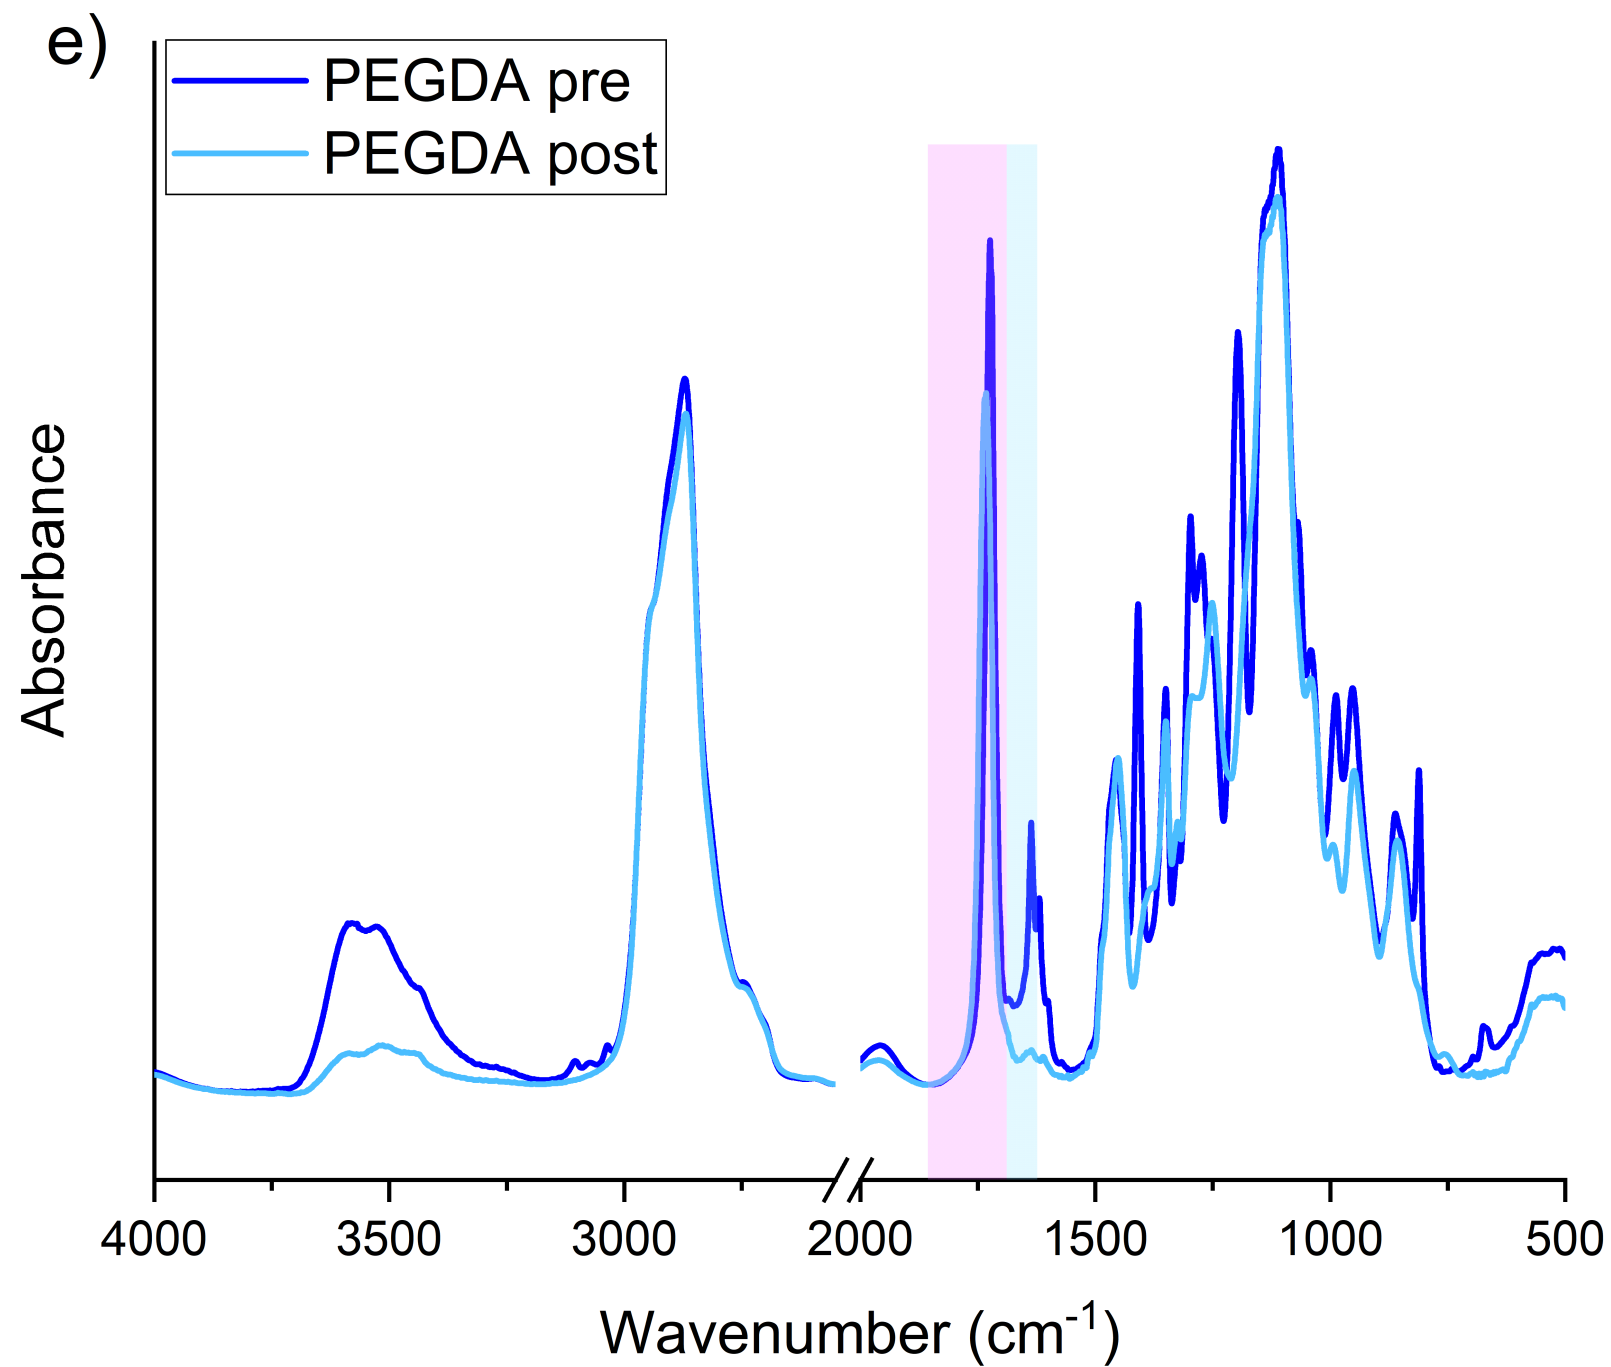

Supplement: s1 [file s1]

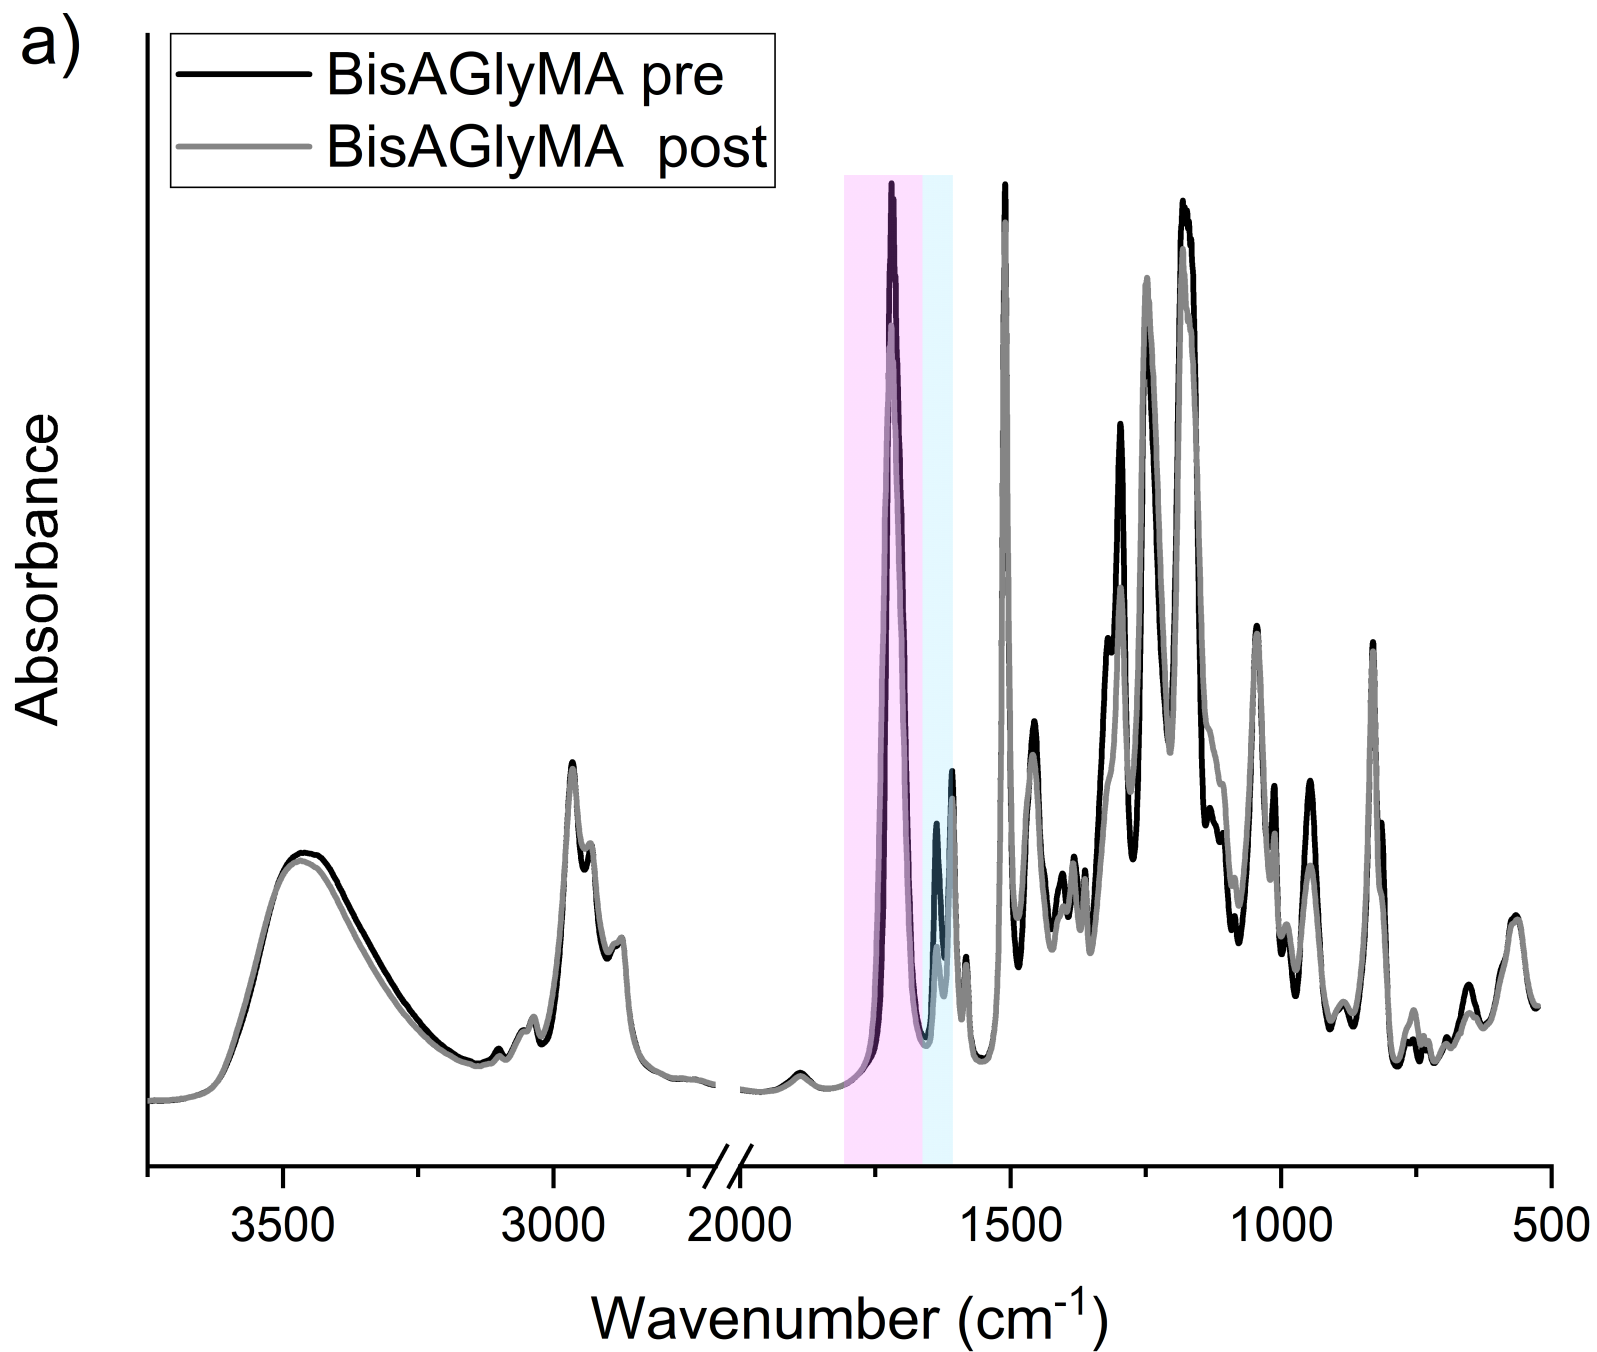

Supplement: s1 [file s1]

a)

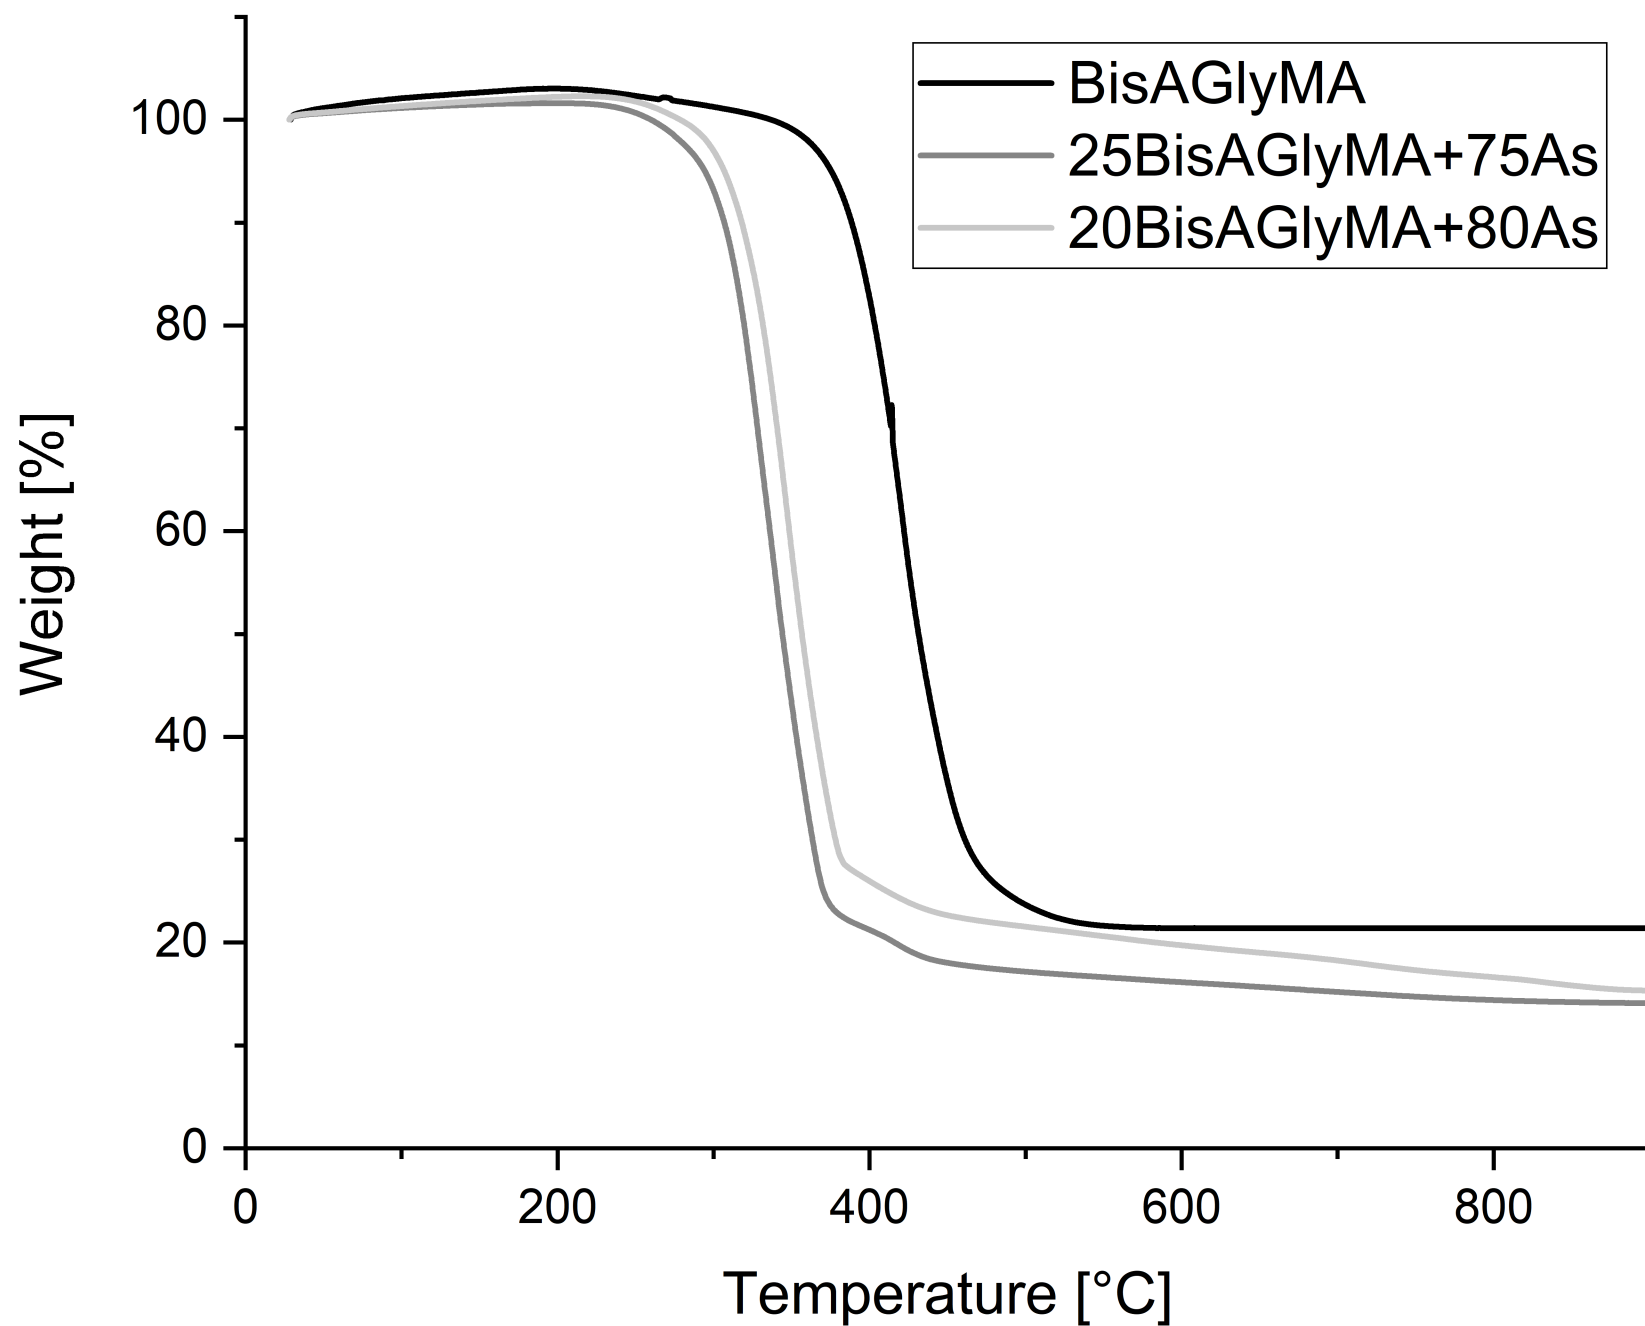

Supplement: s1 [file s1]

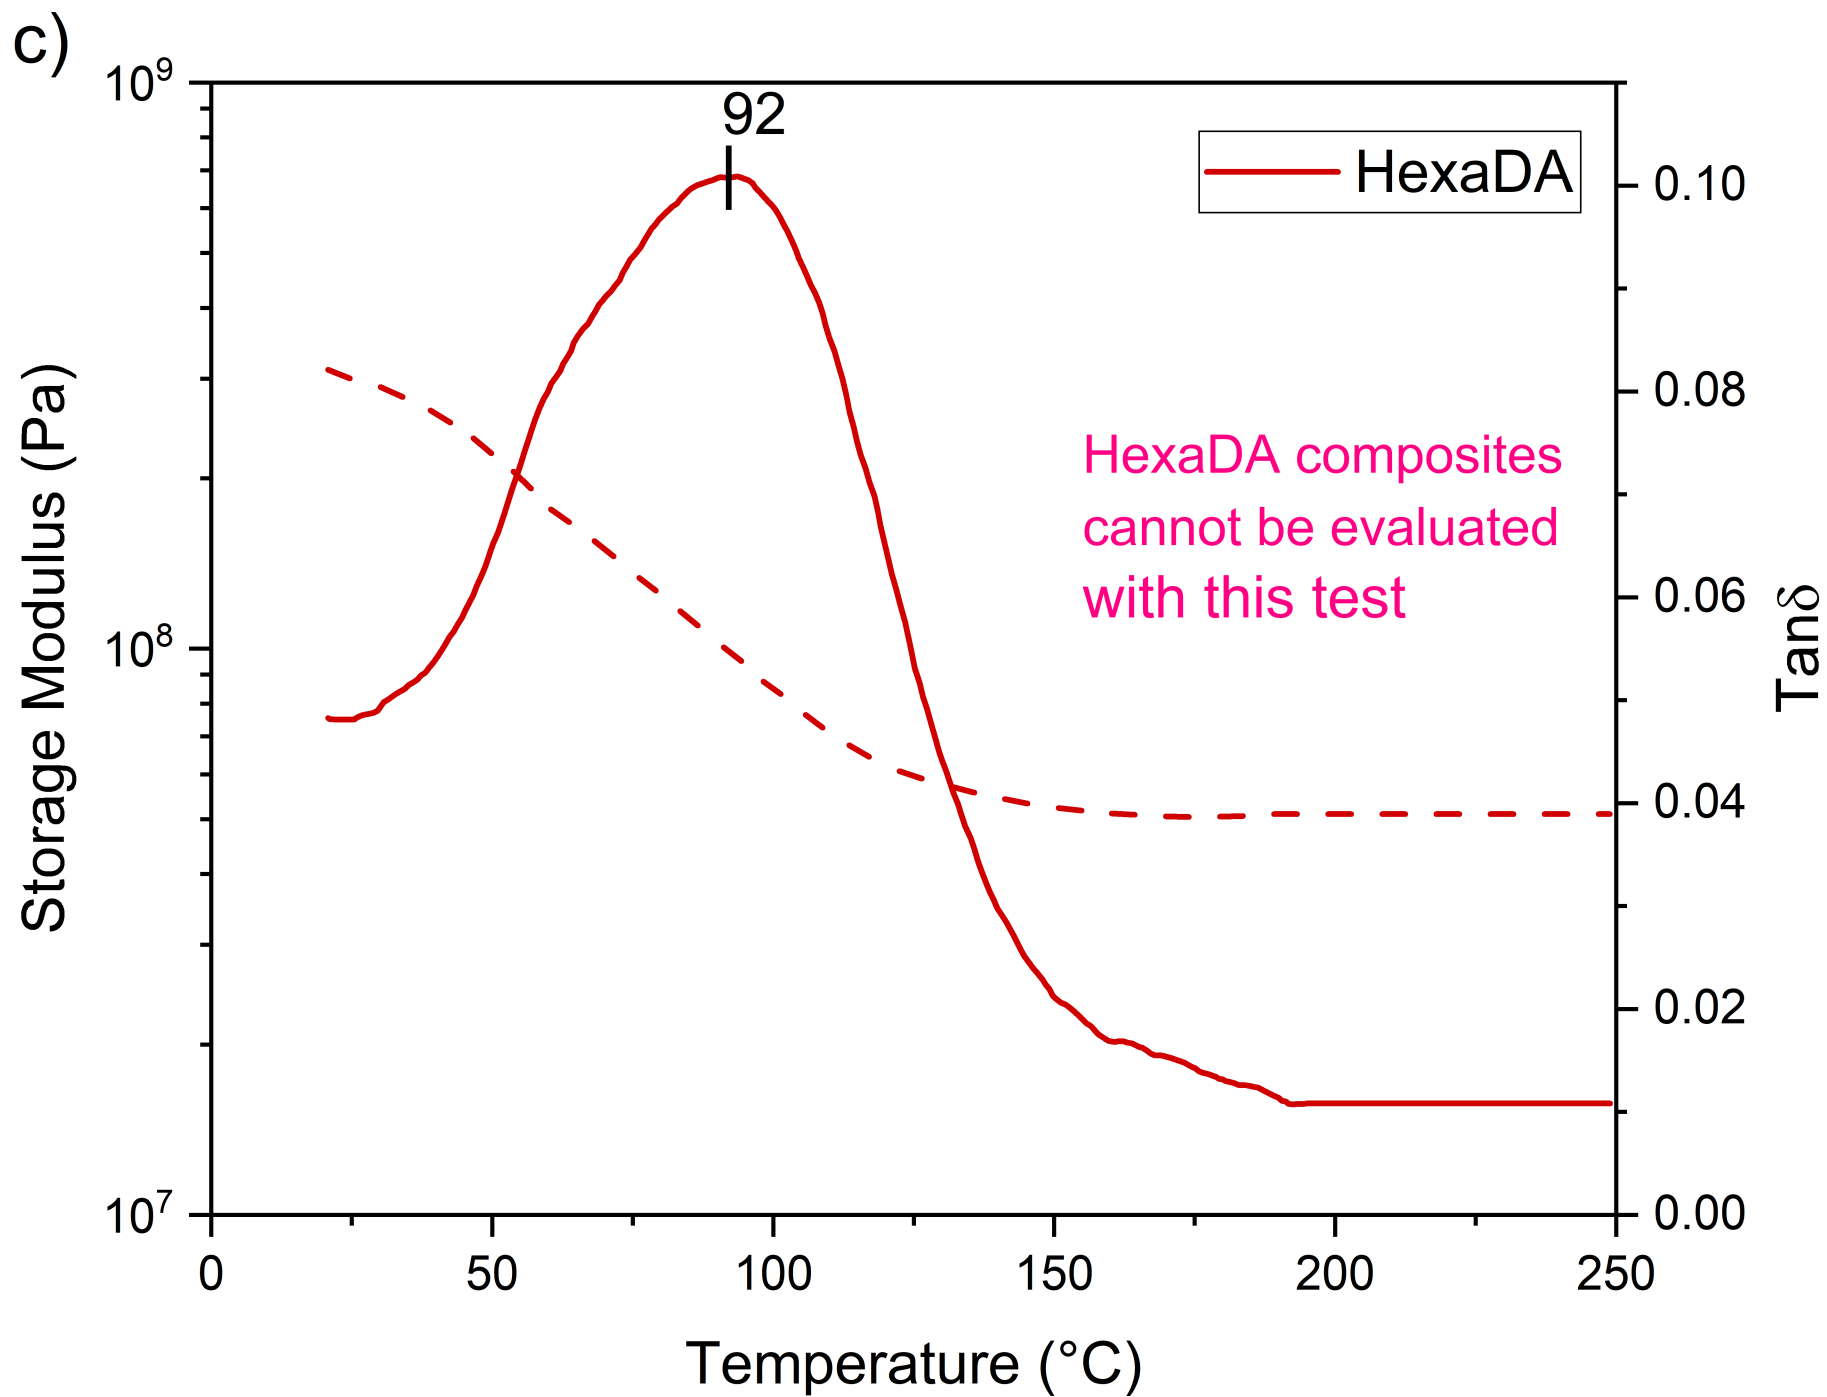

Supplement: s1 [file s1]

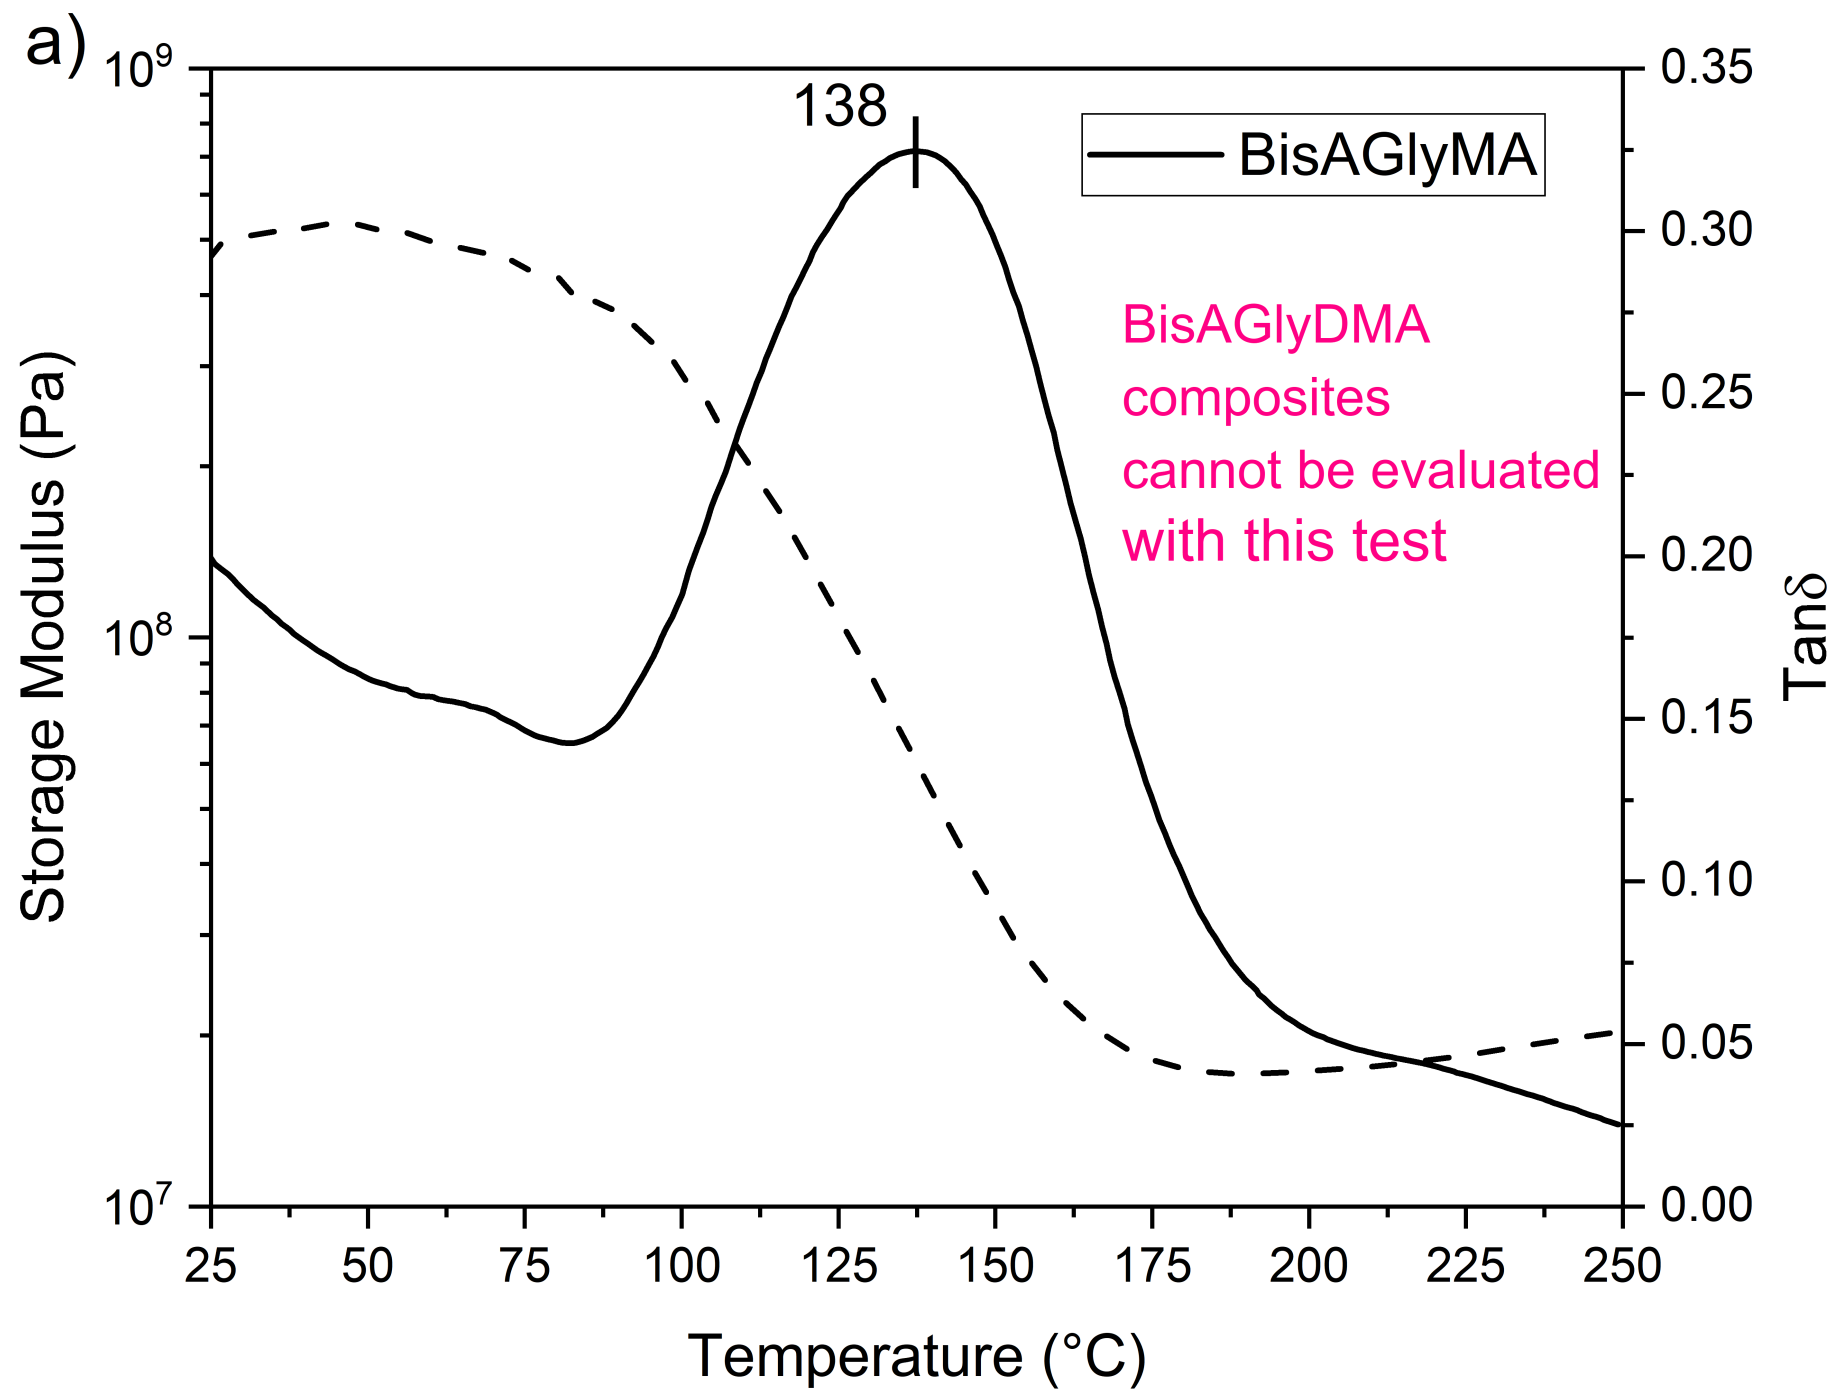

Supplement: s1 [file s1]

b)

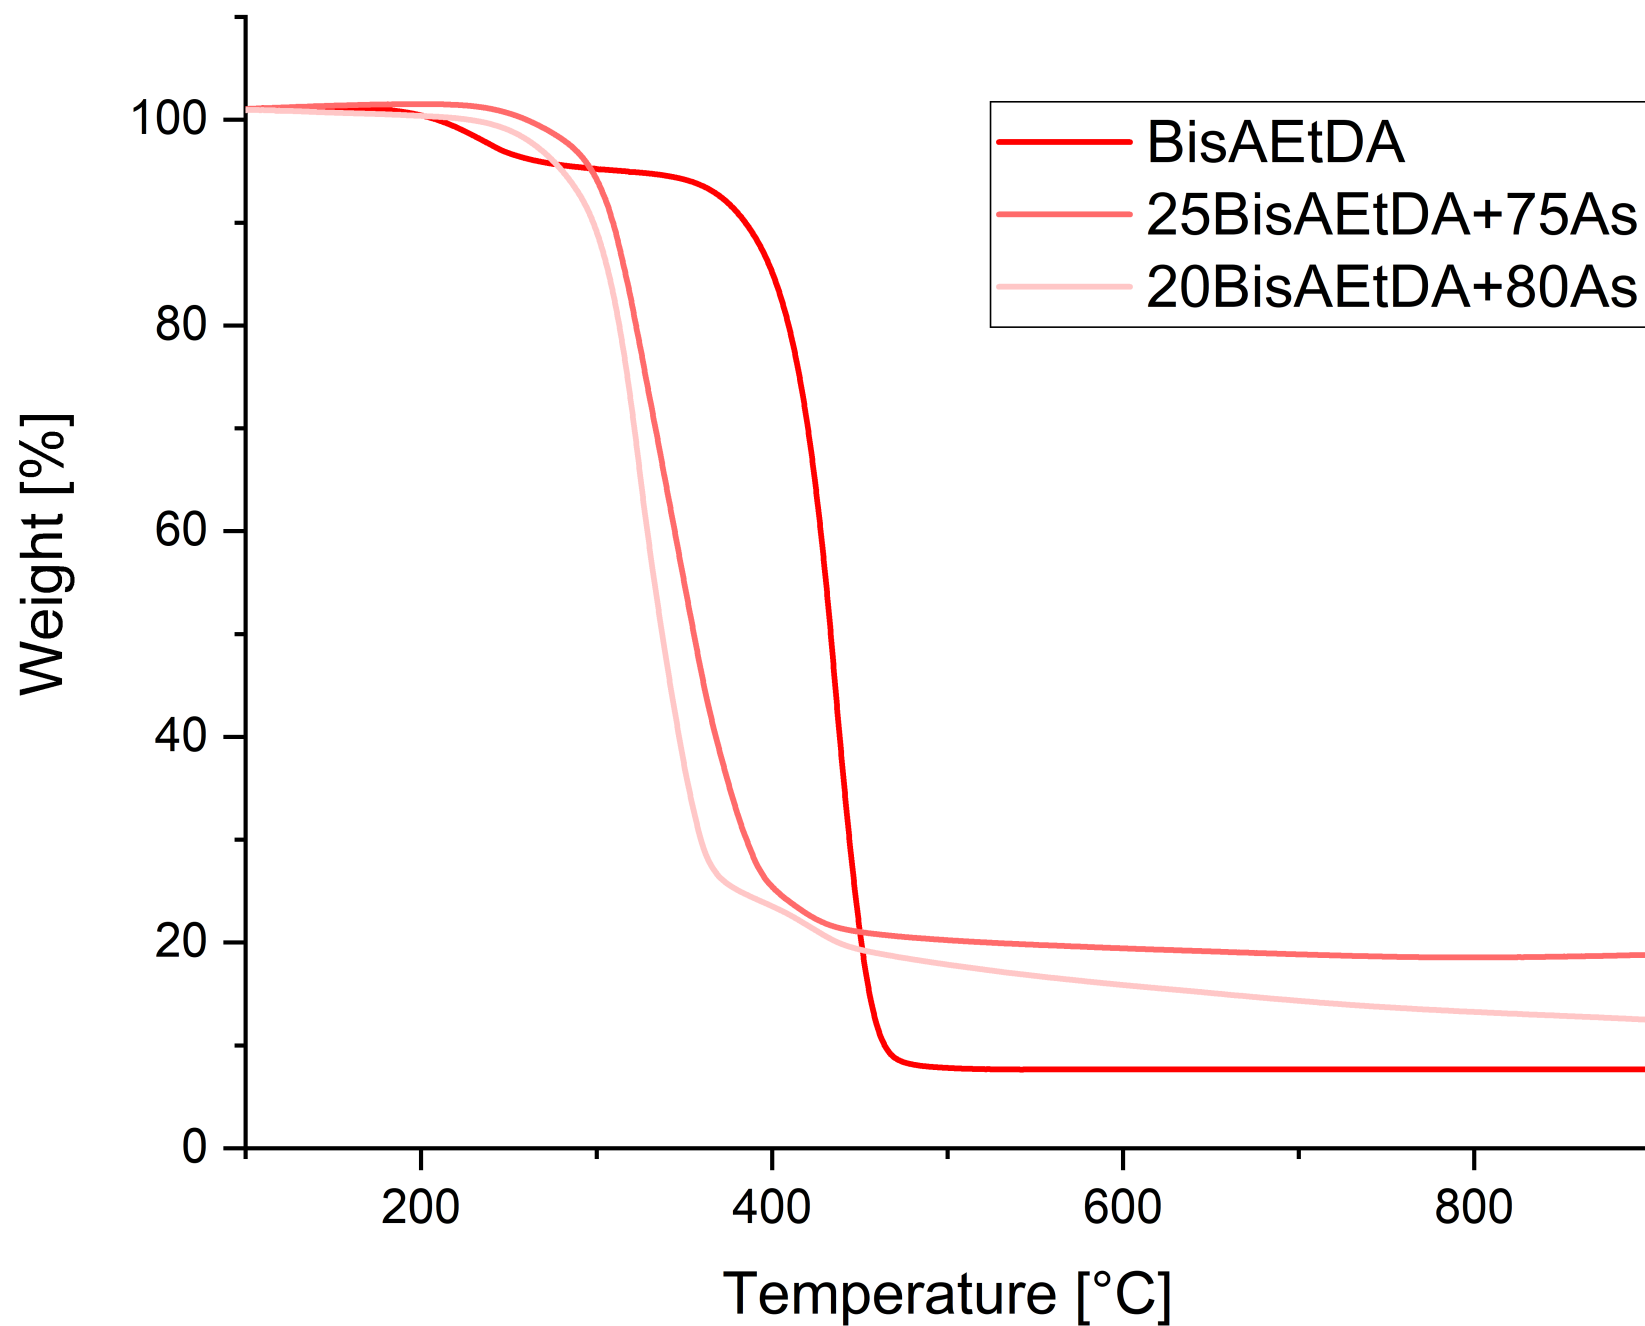

Supplement: s1 [file s1]

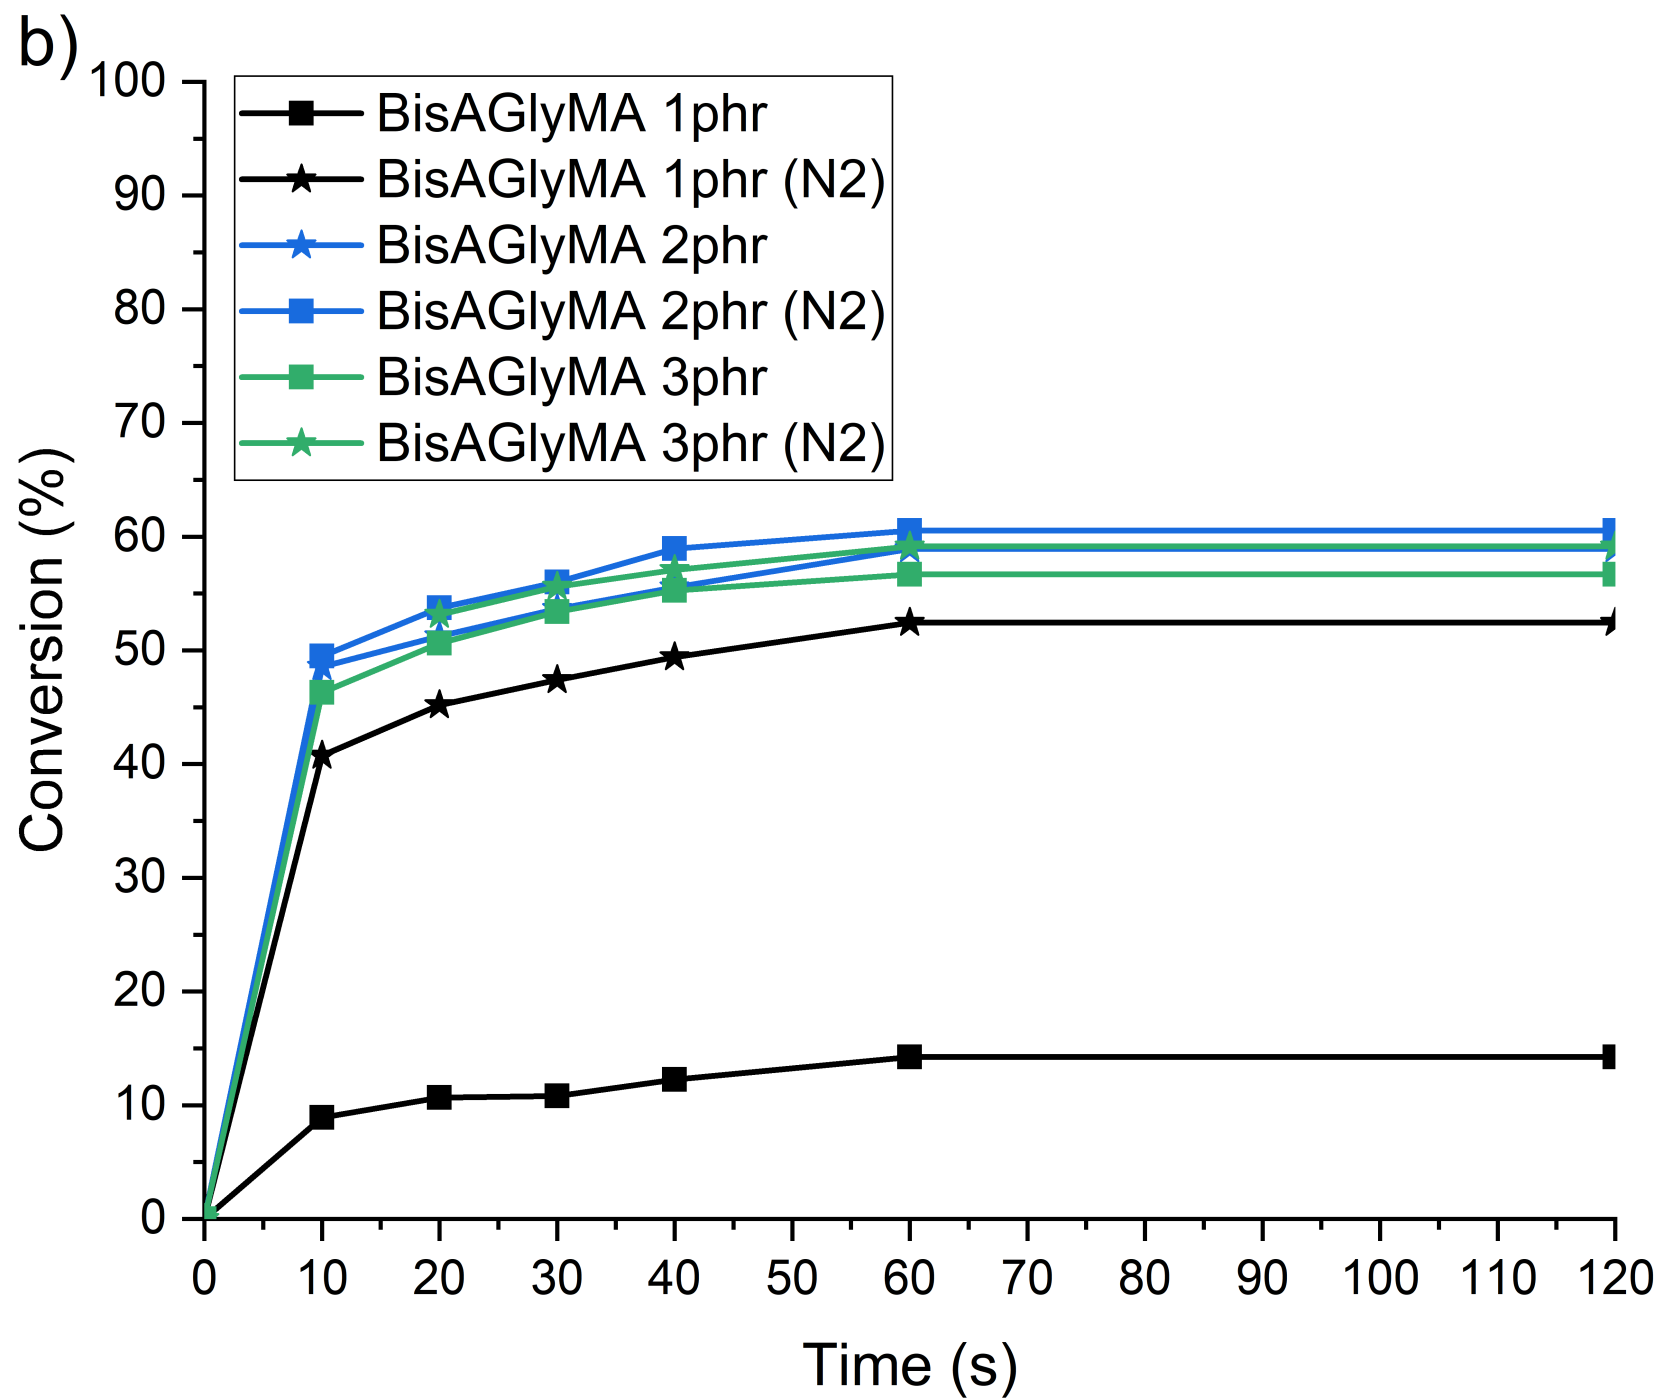

Supplement: s1 [file s1]

f)

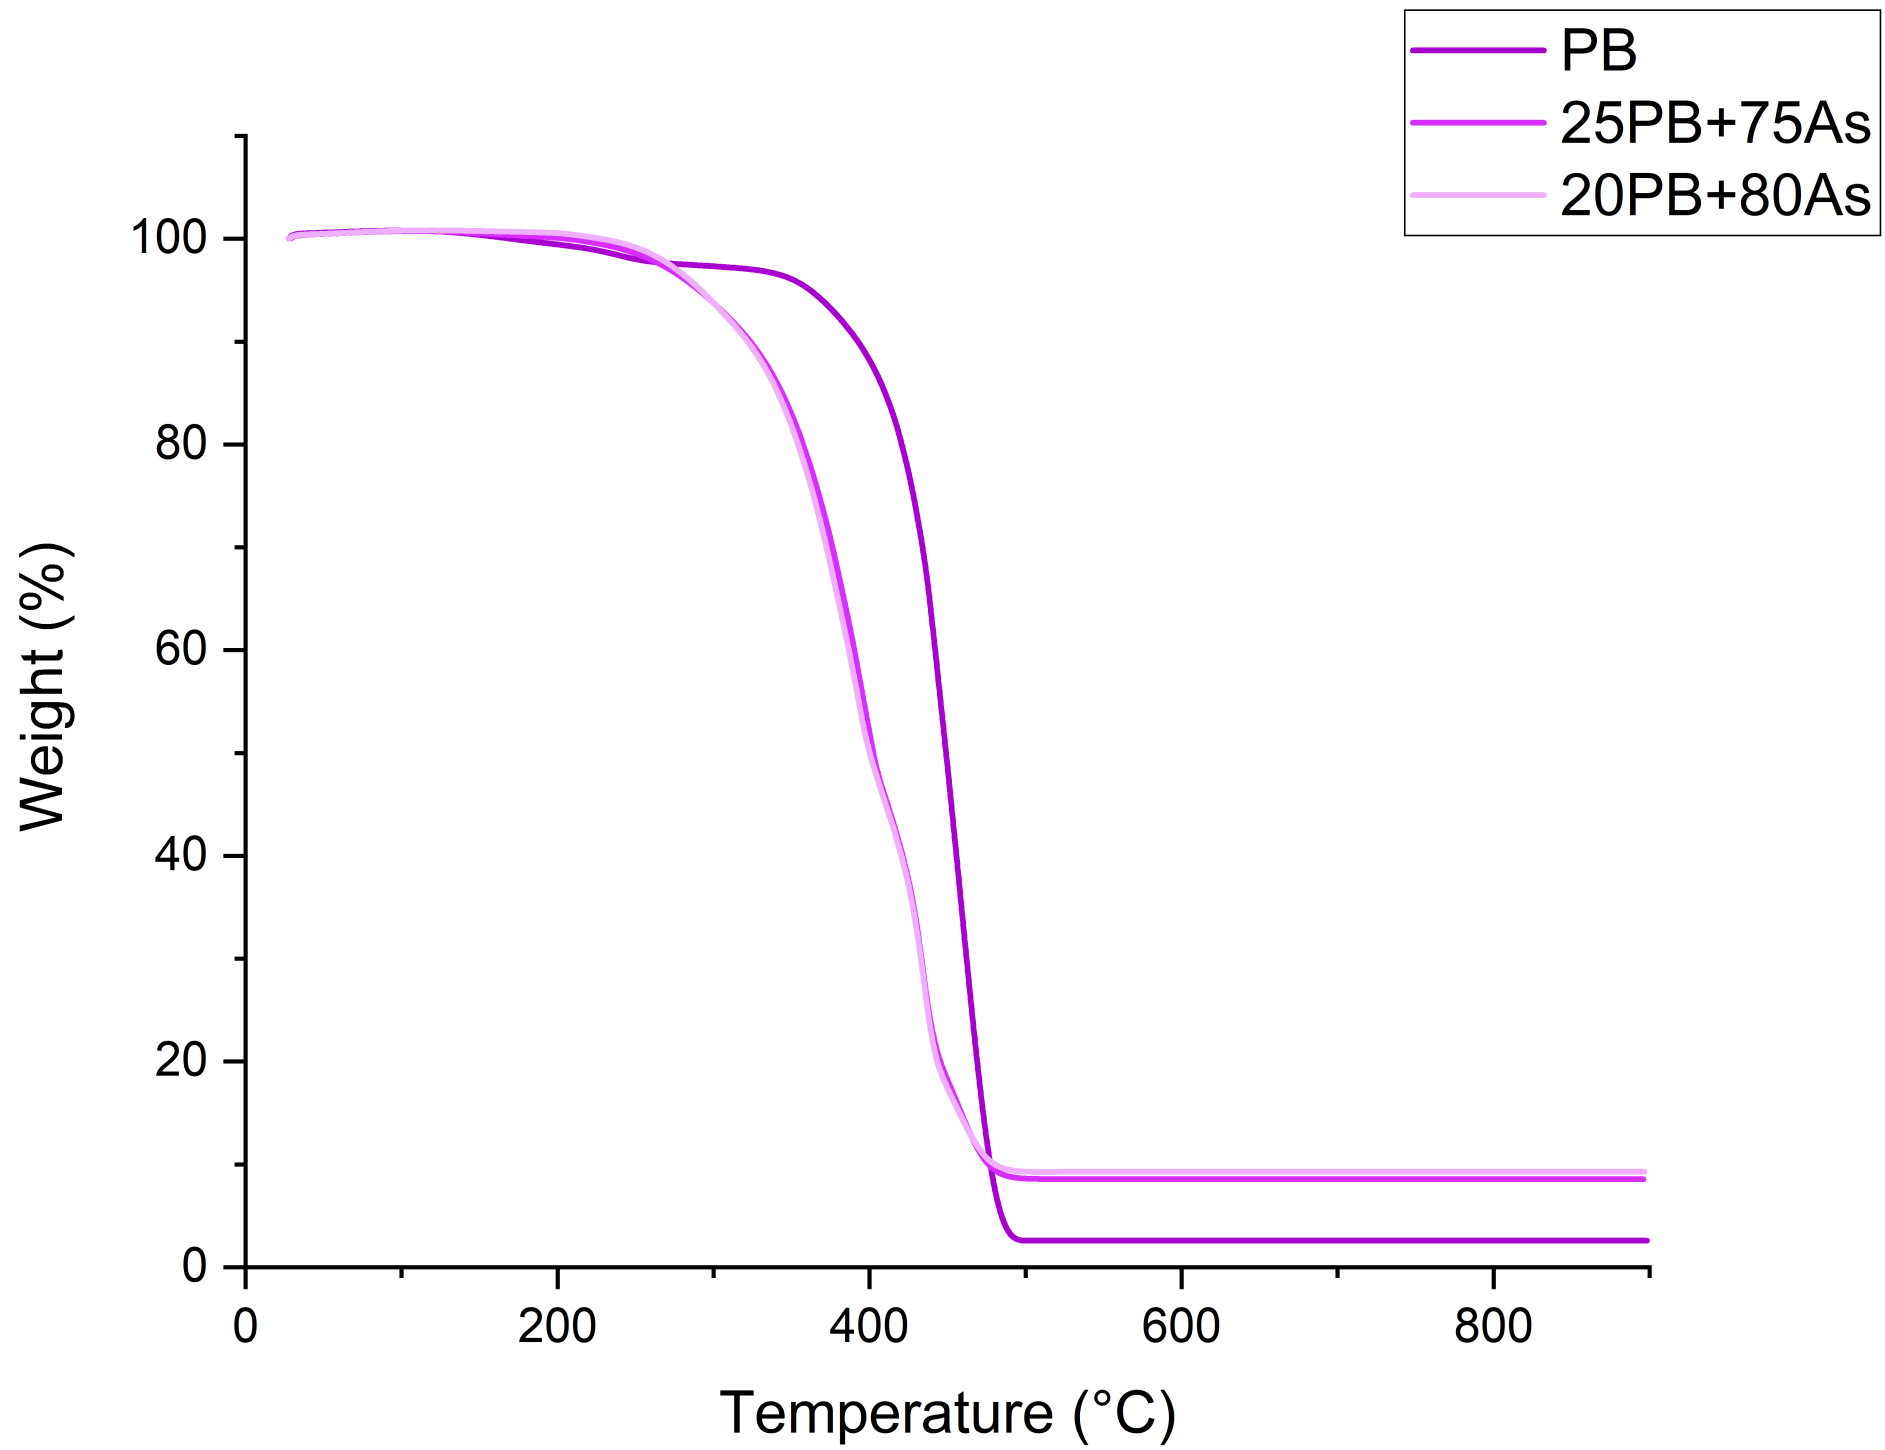

Supplement: s1 [file s1]

c)

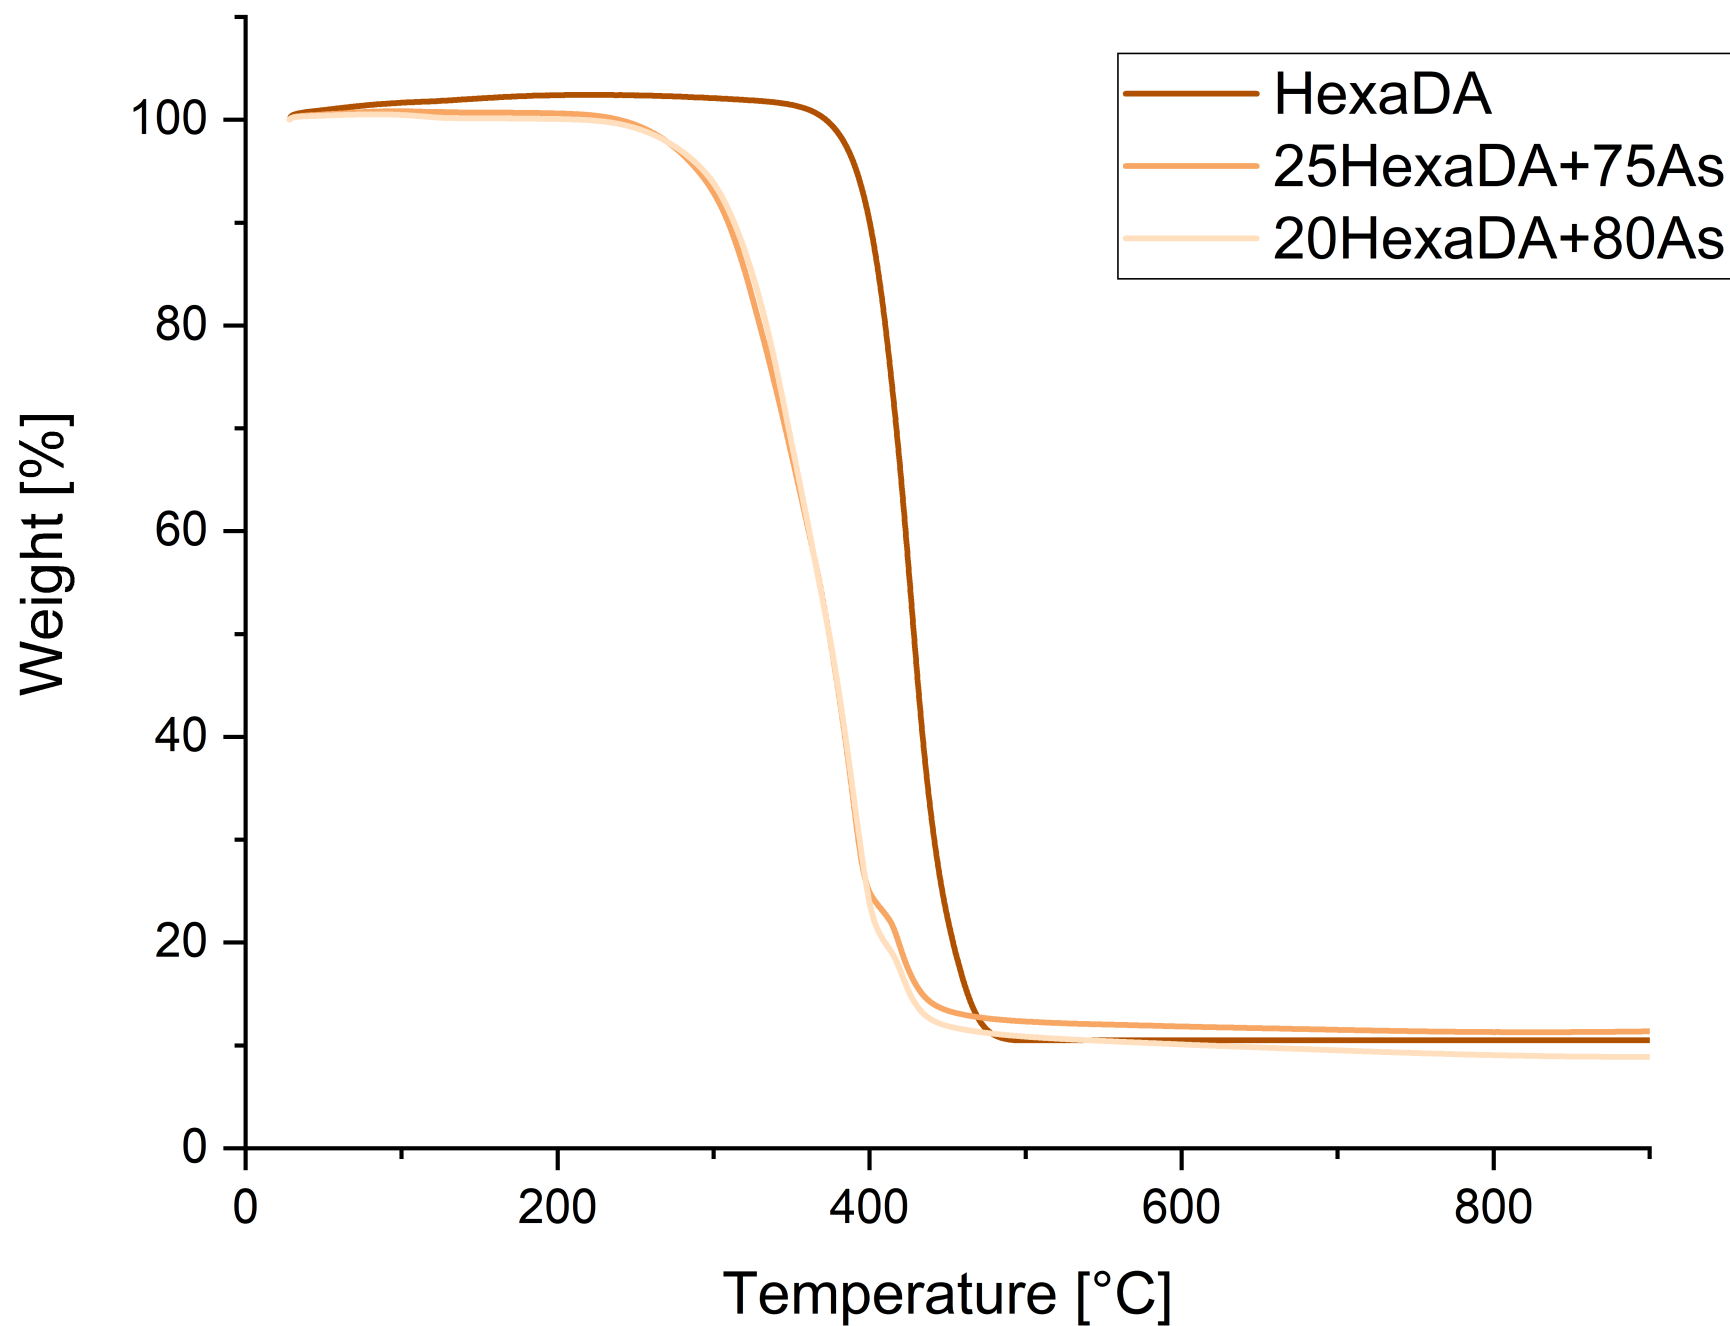

Supplement: s1 [file s1]

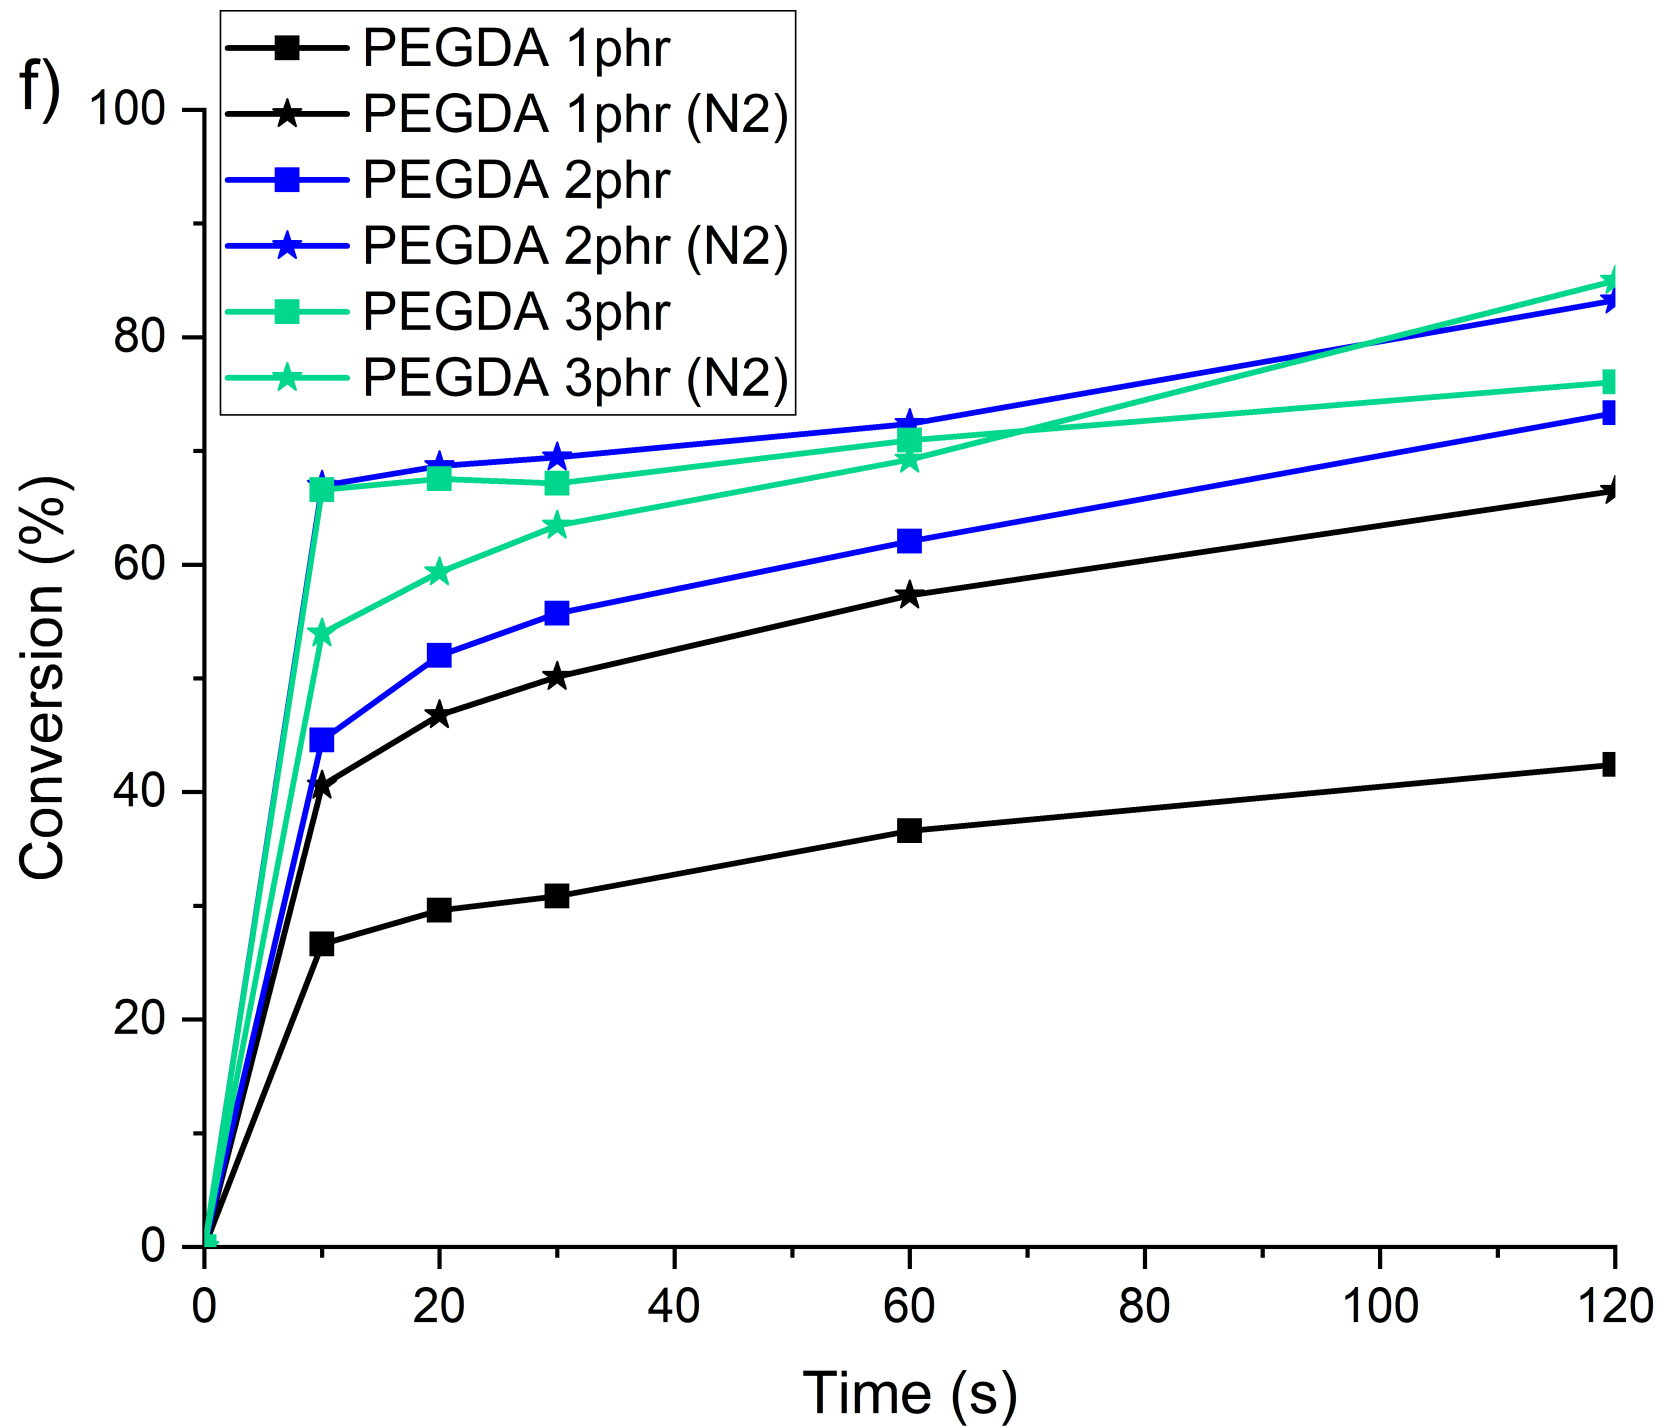

Supplement: s1 [file s1]

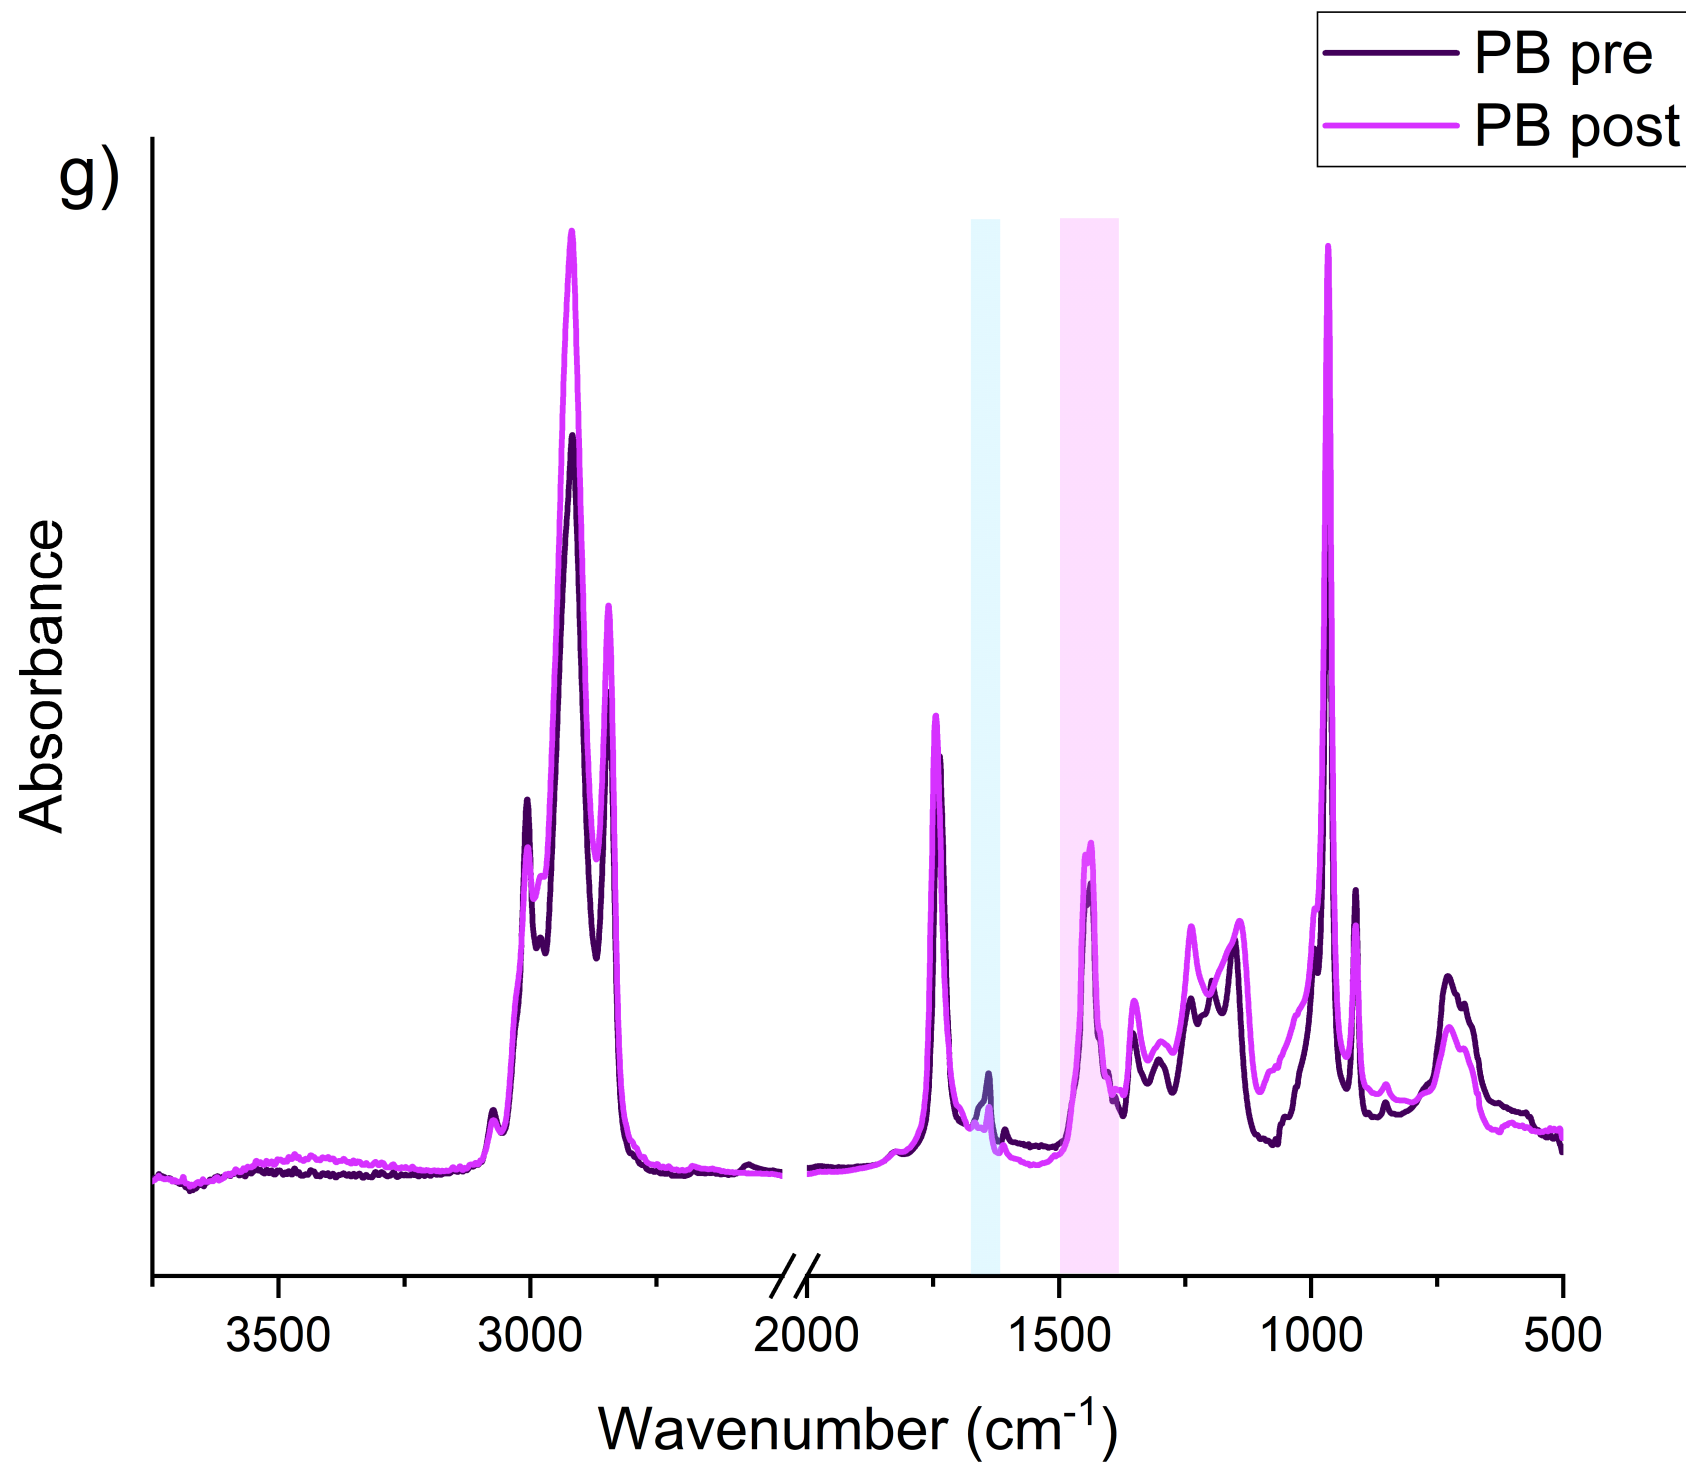

Supplement: s1 [file s1]

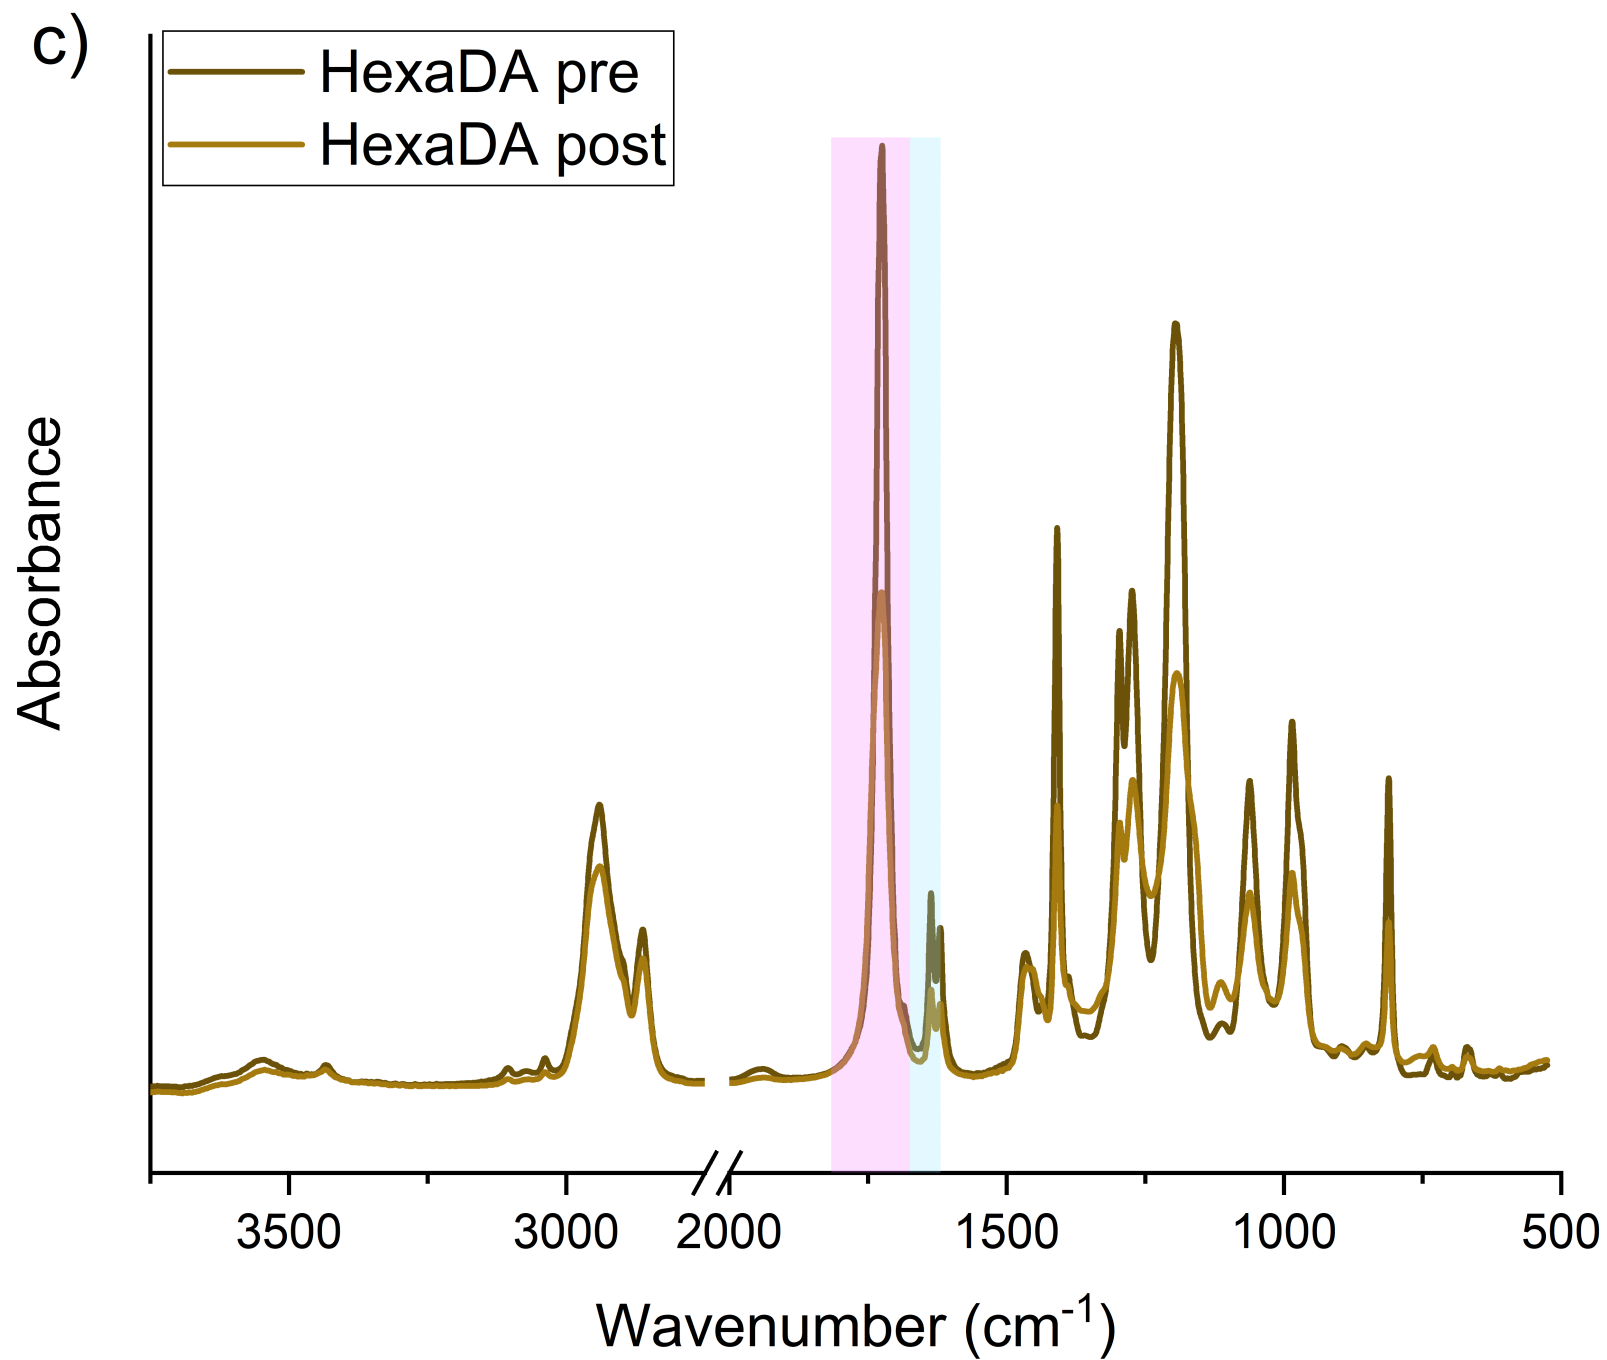

Supplement: s1 [file s1]

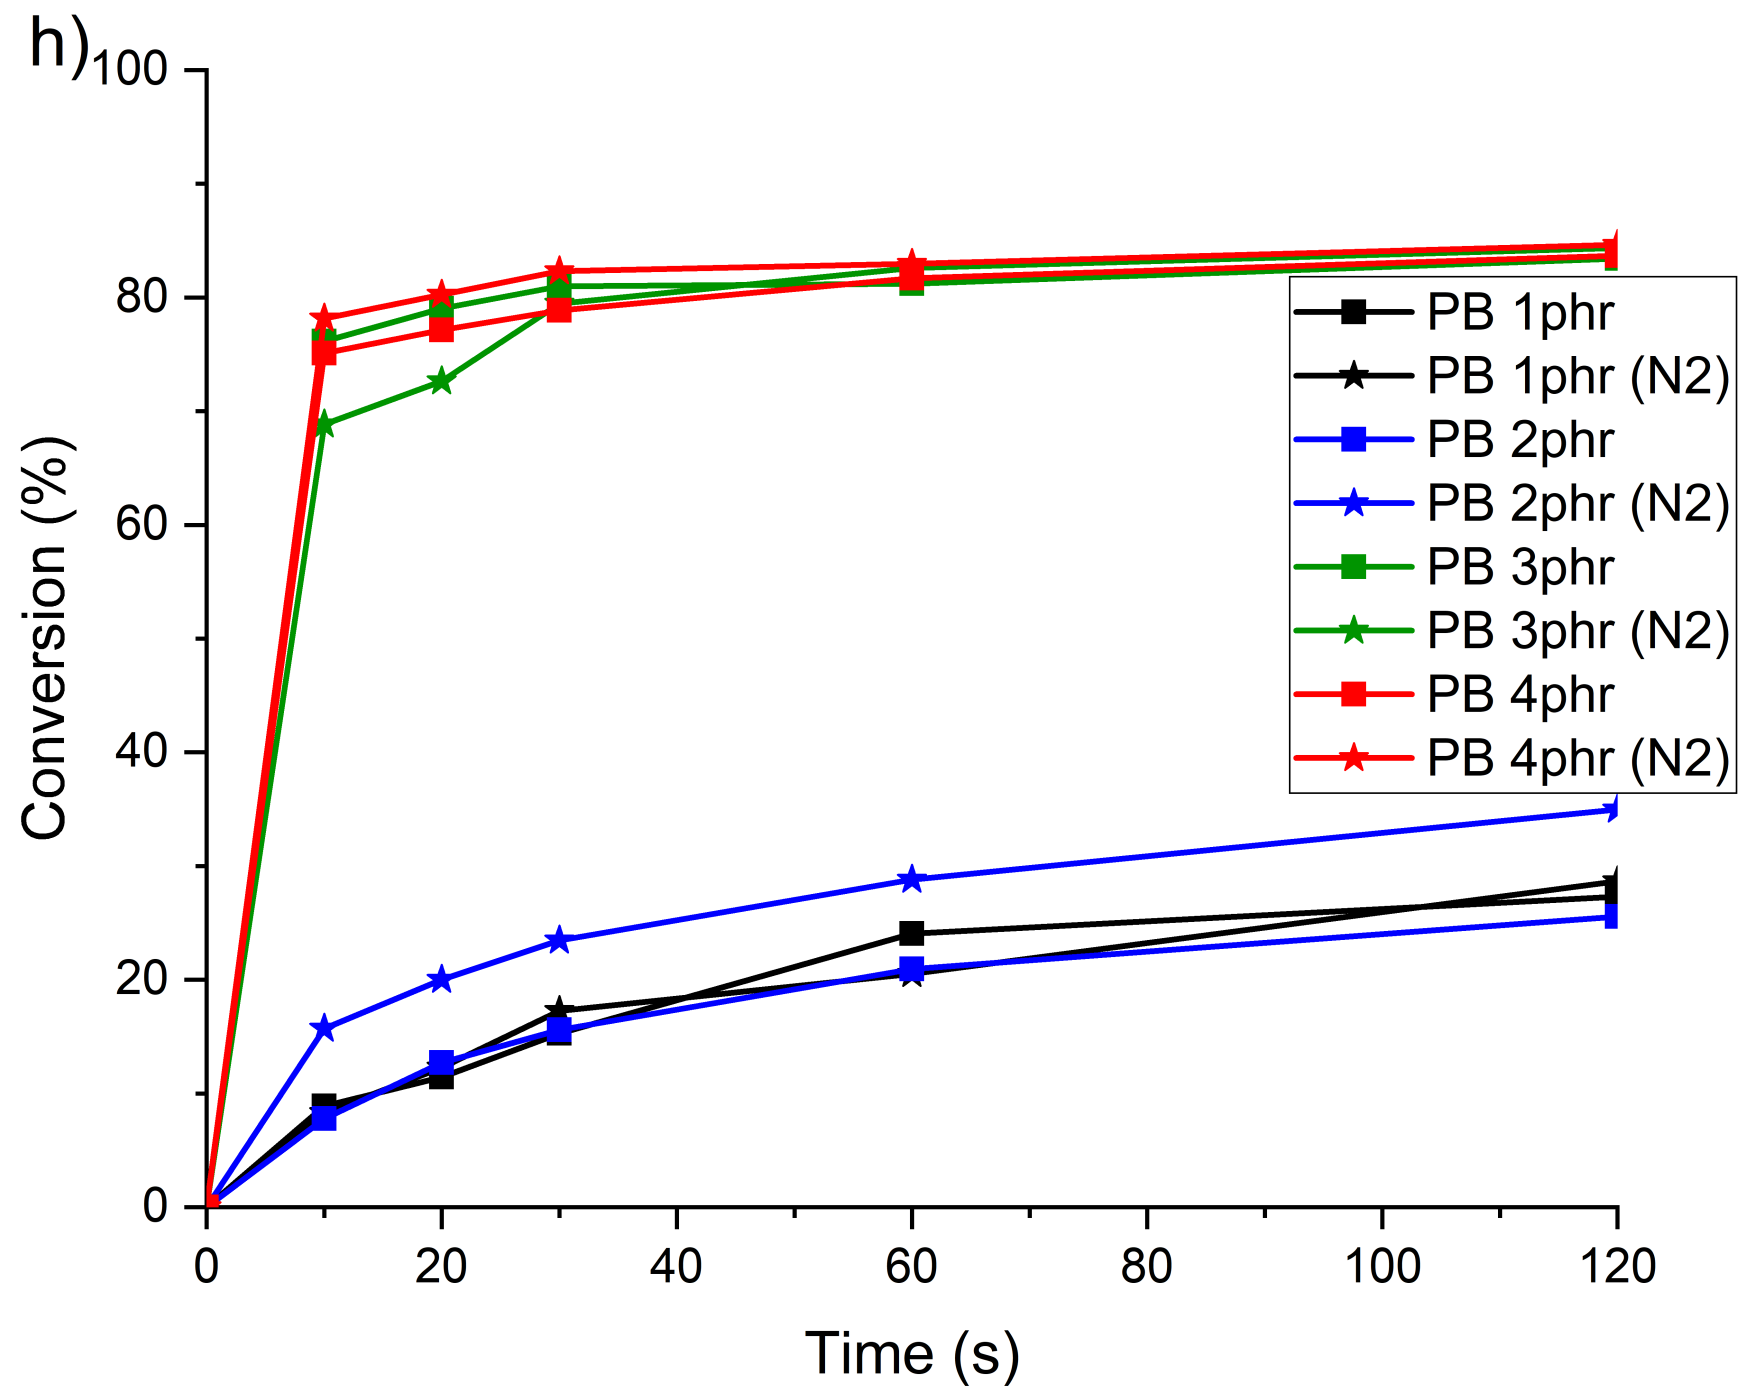

Supplement: s1 [file s1]

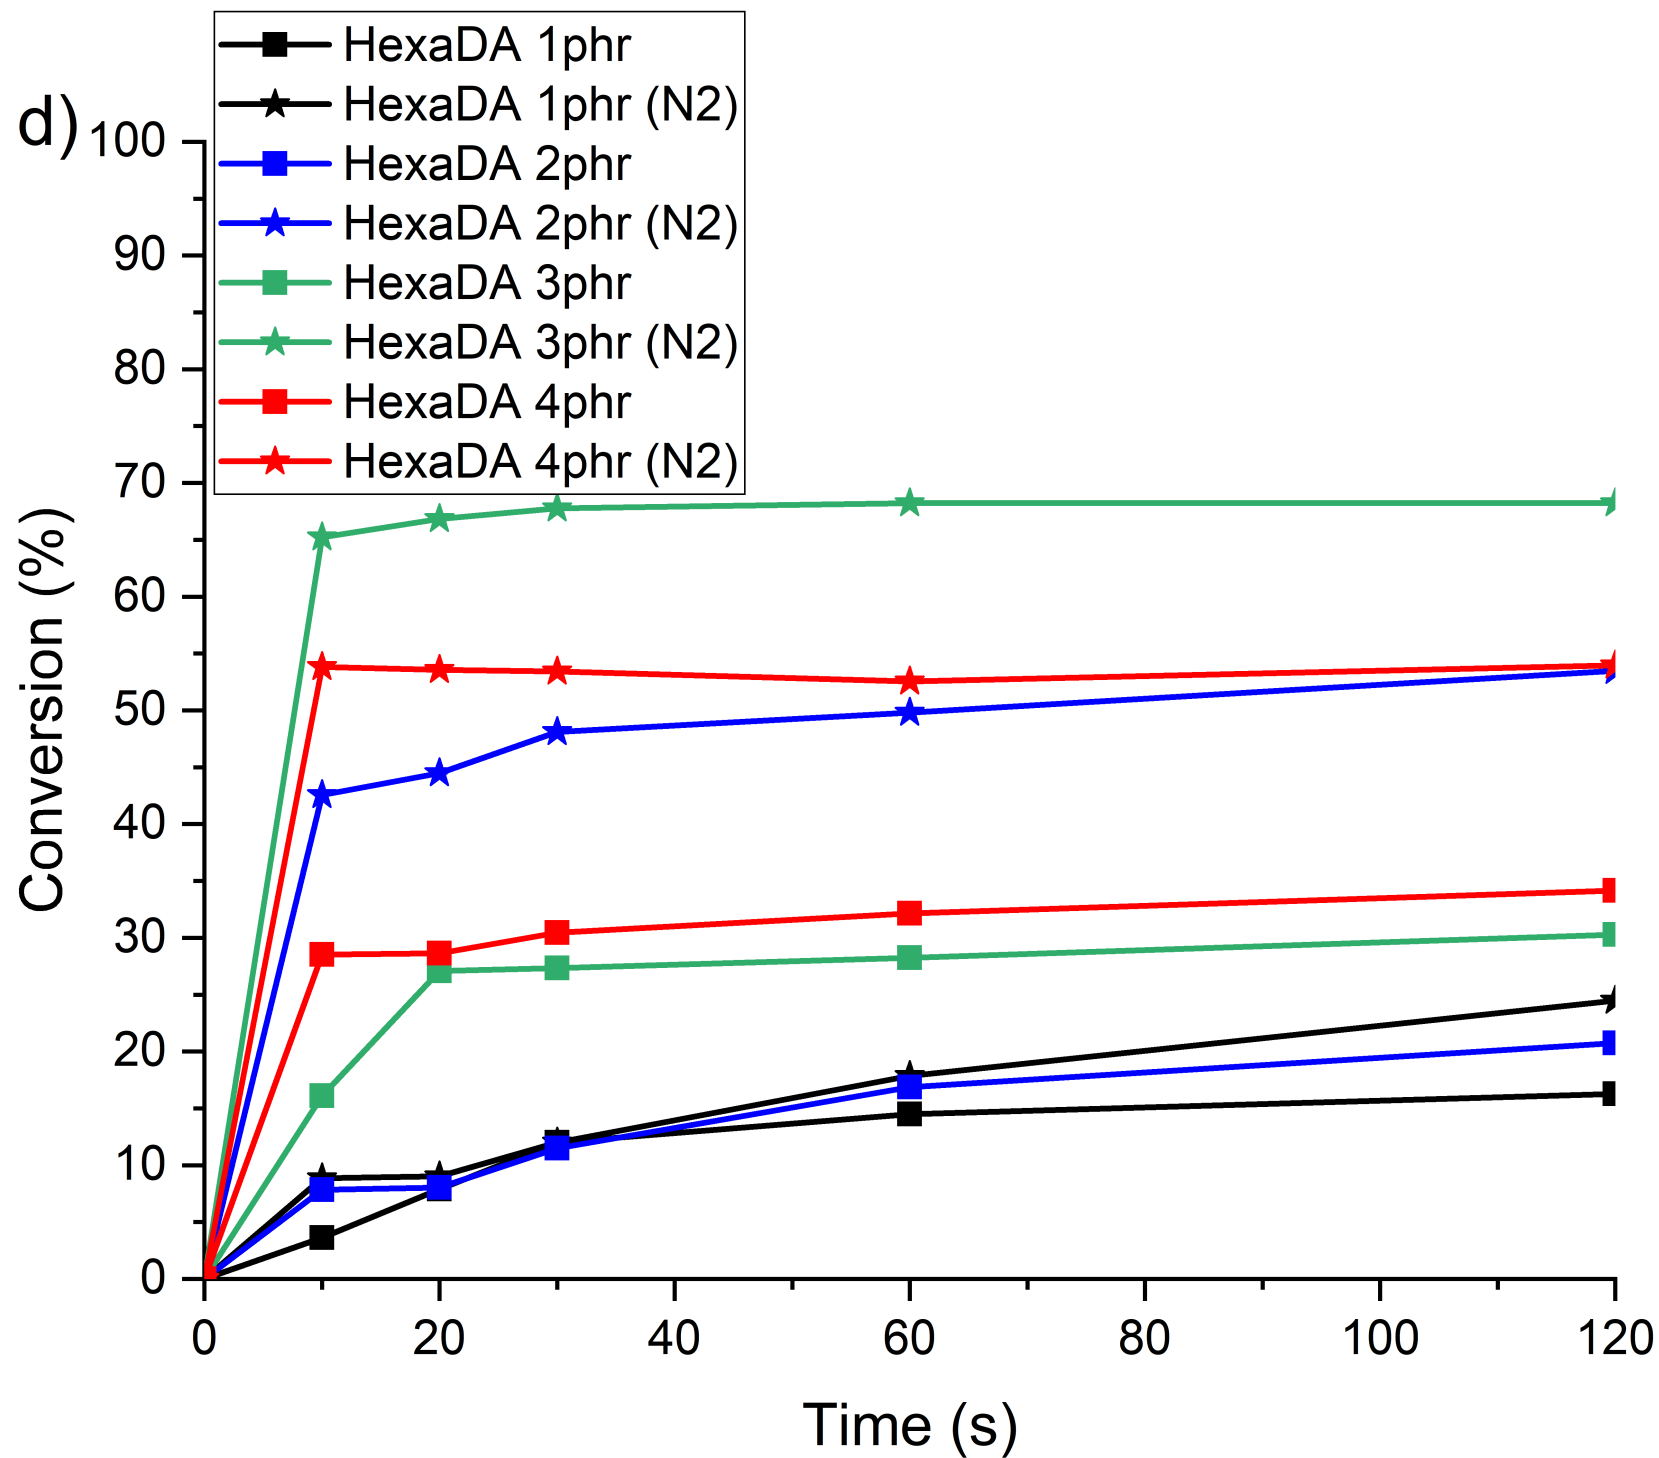

Supplement: s1 [file s1]

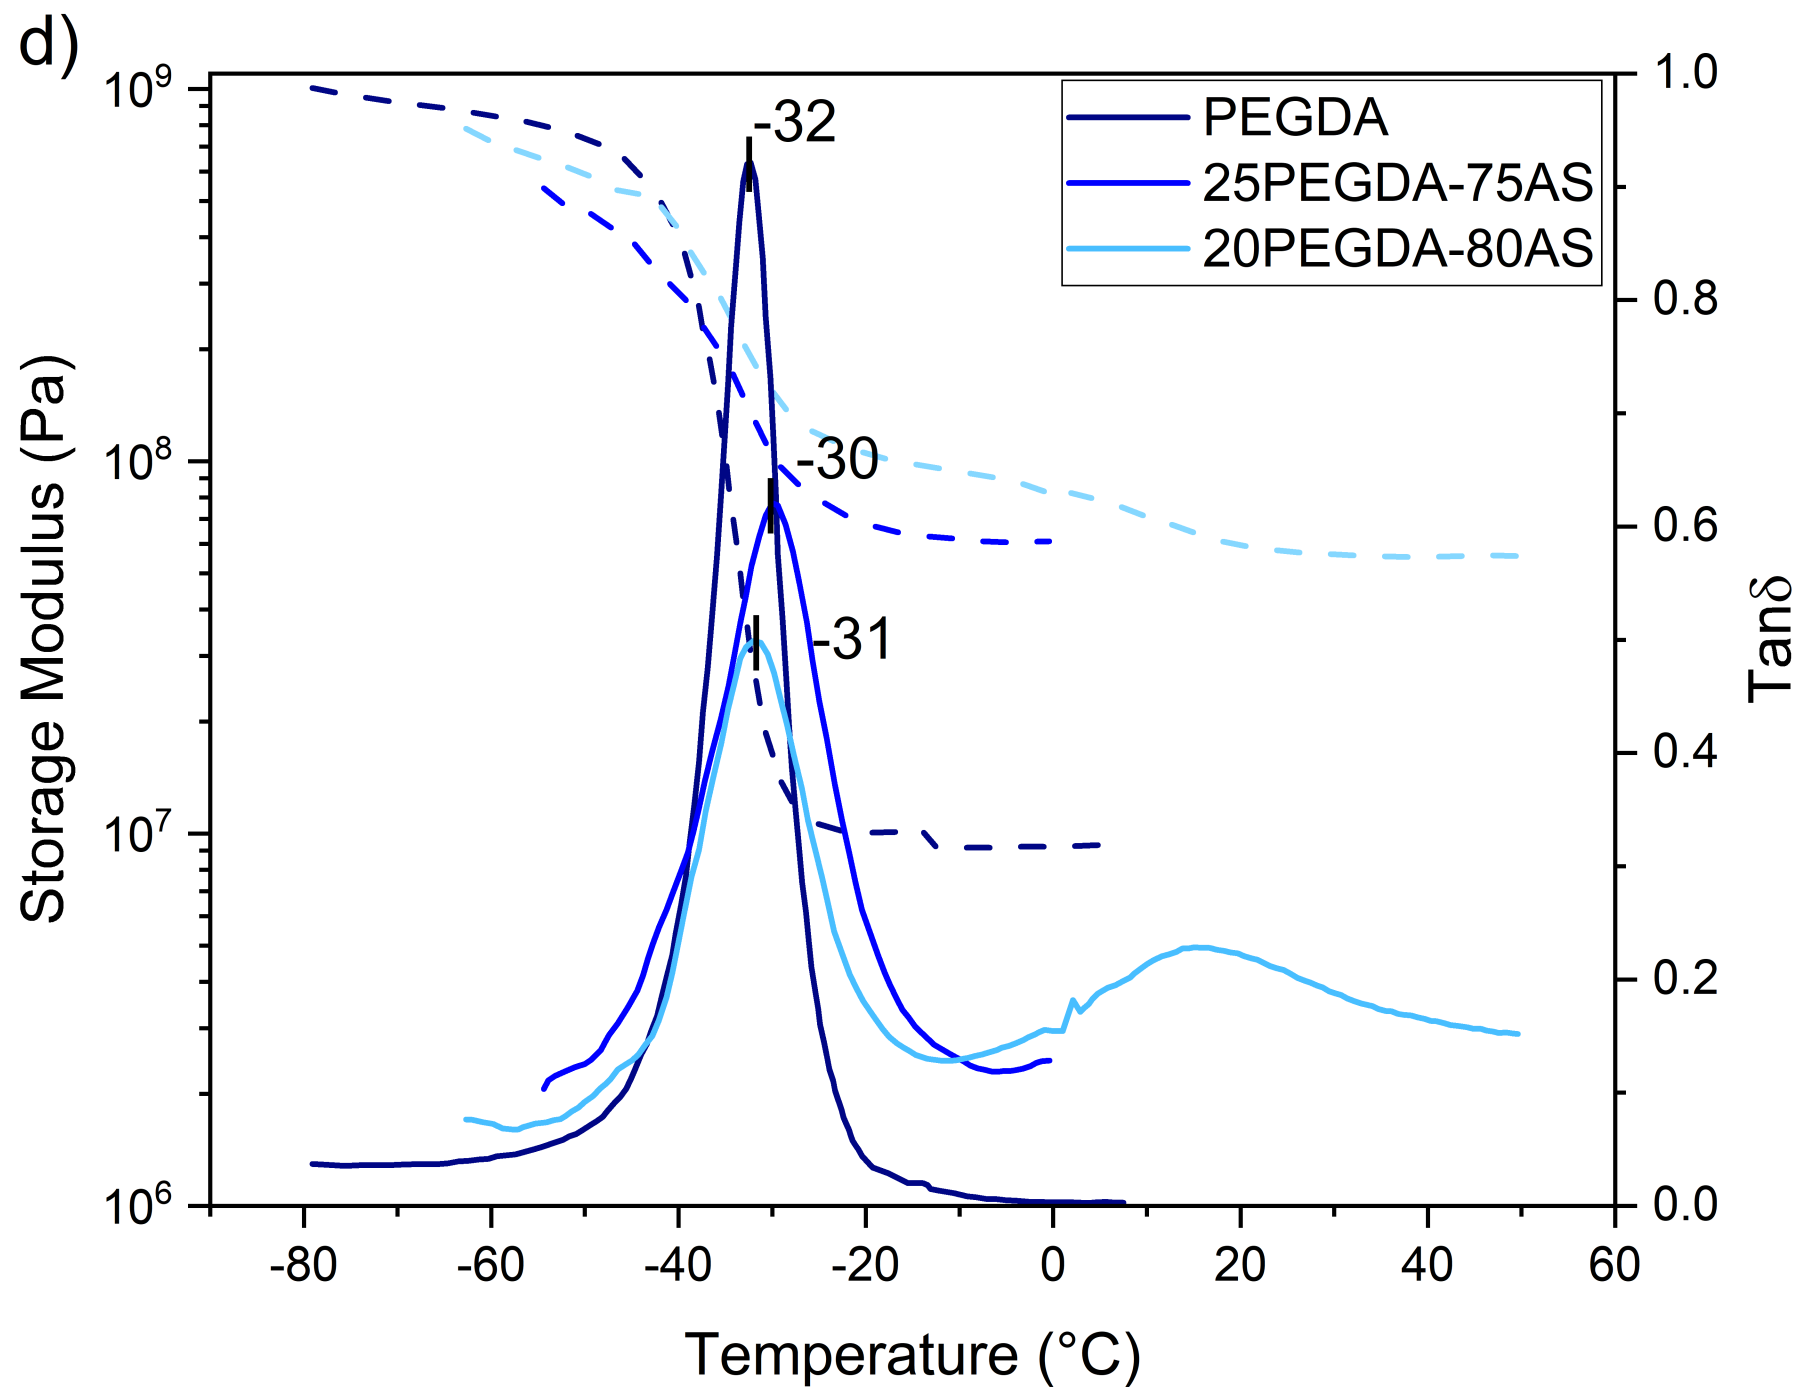

Supplement: s1 [file s1]

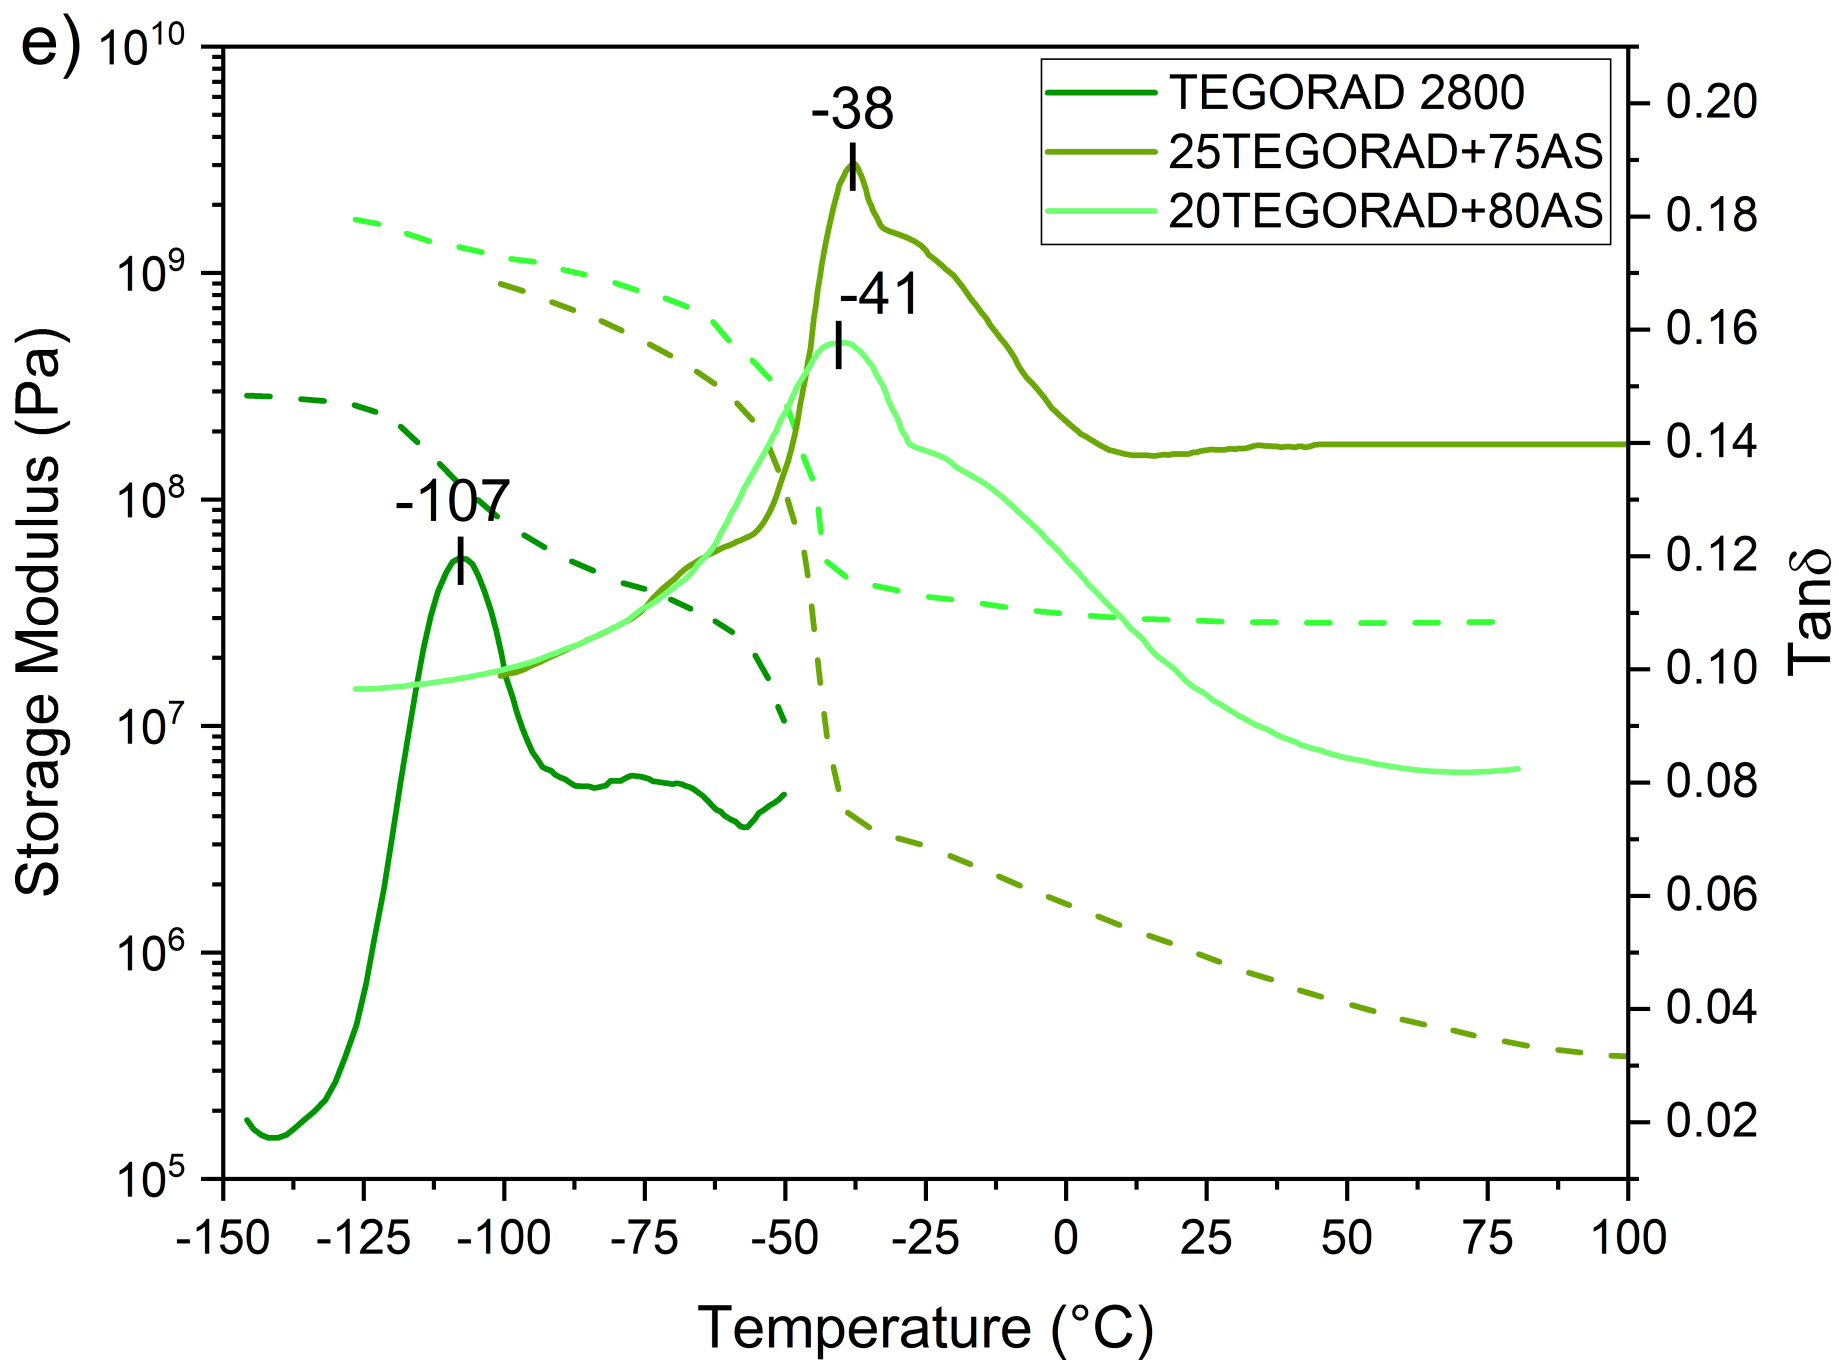

Supplement: s1 [file s1]

d)

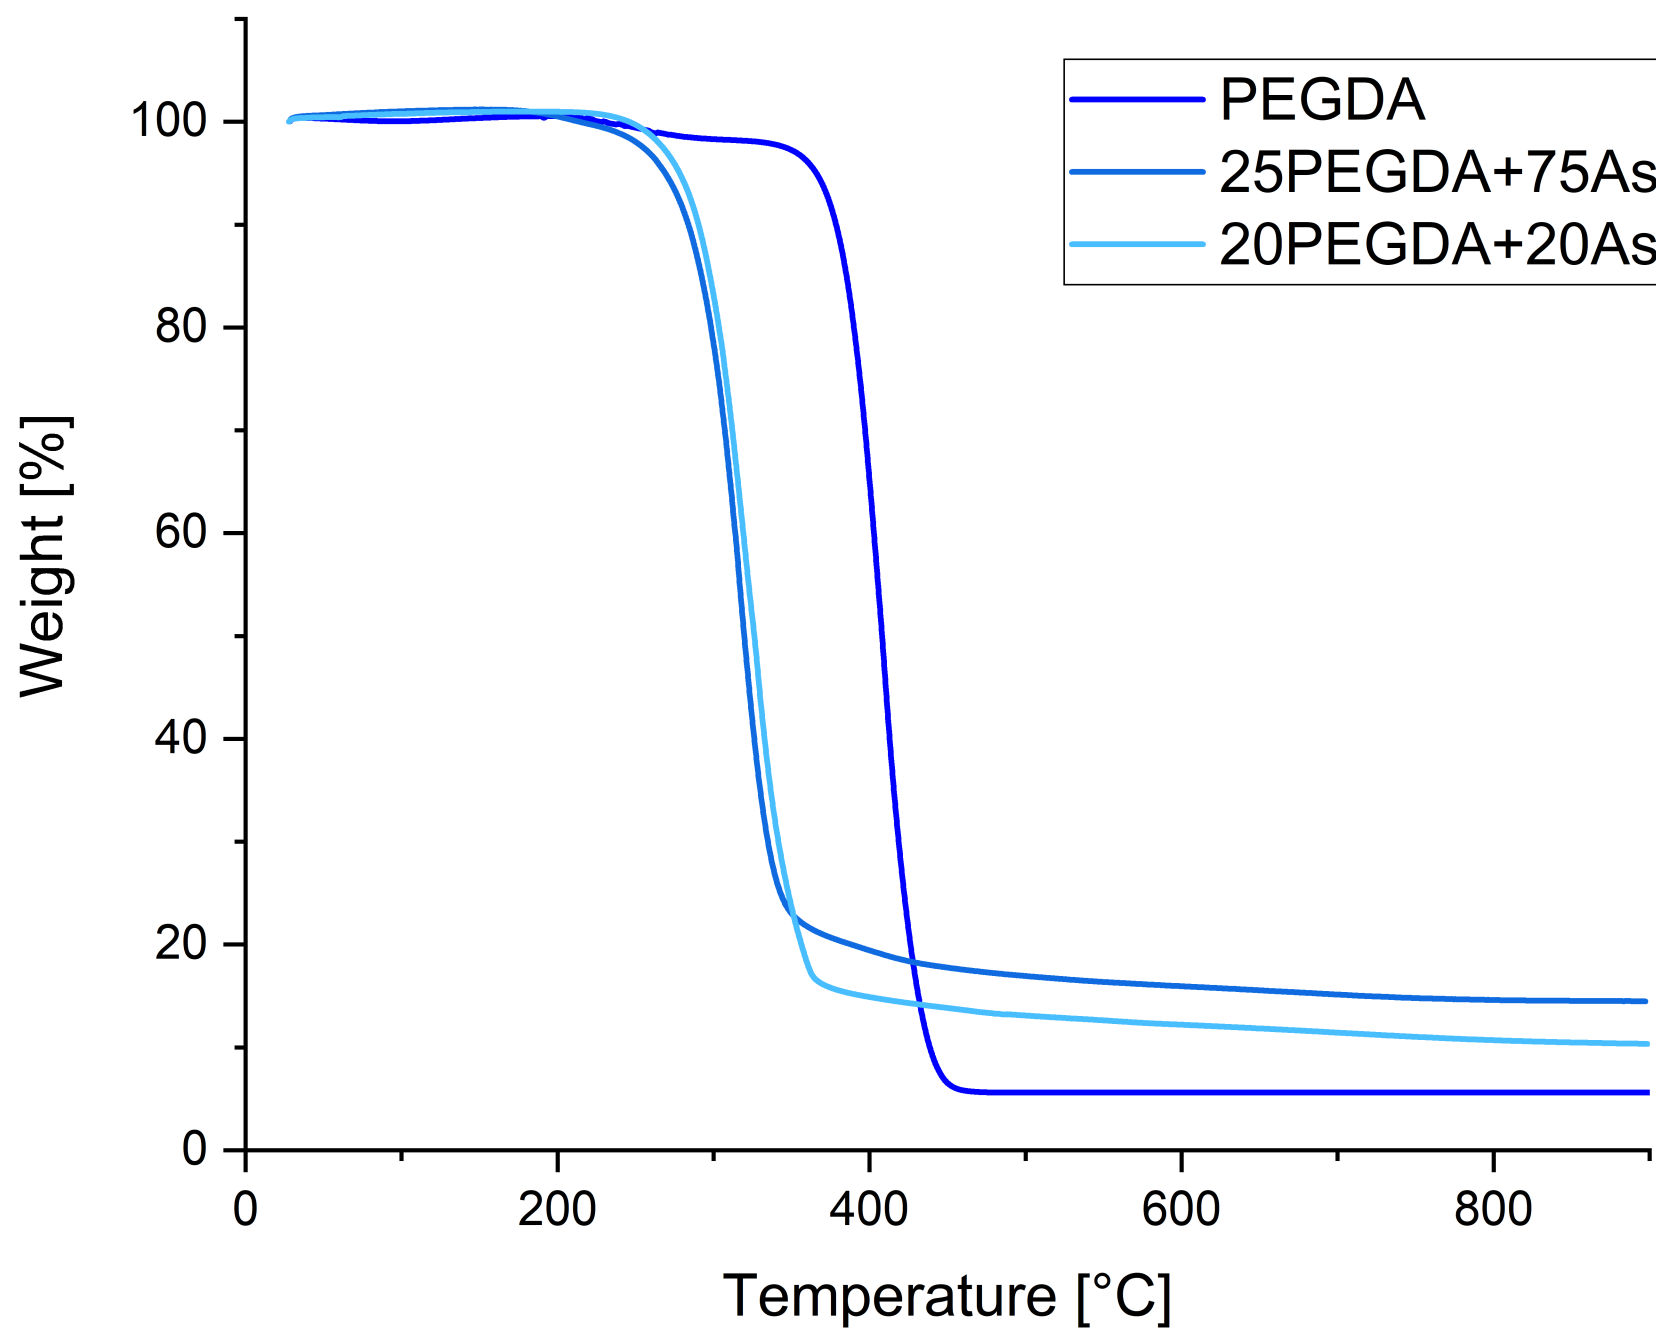

Supplement: s1 [file s1]

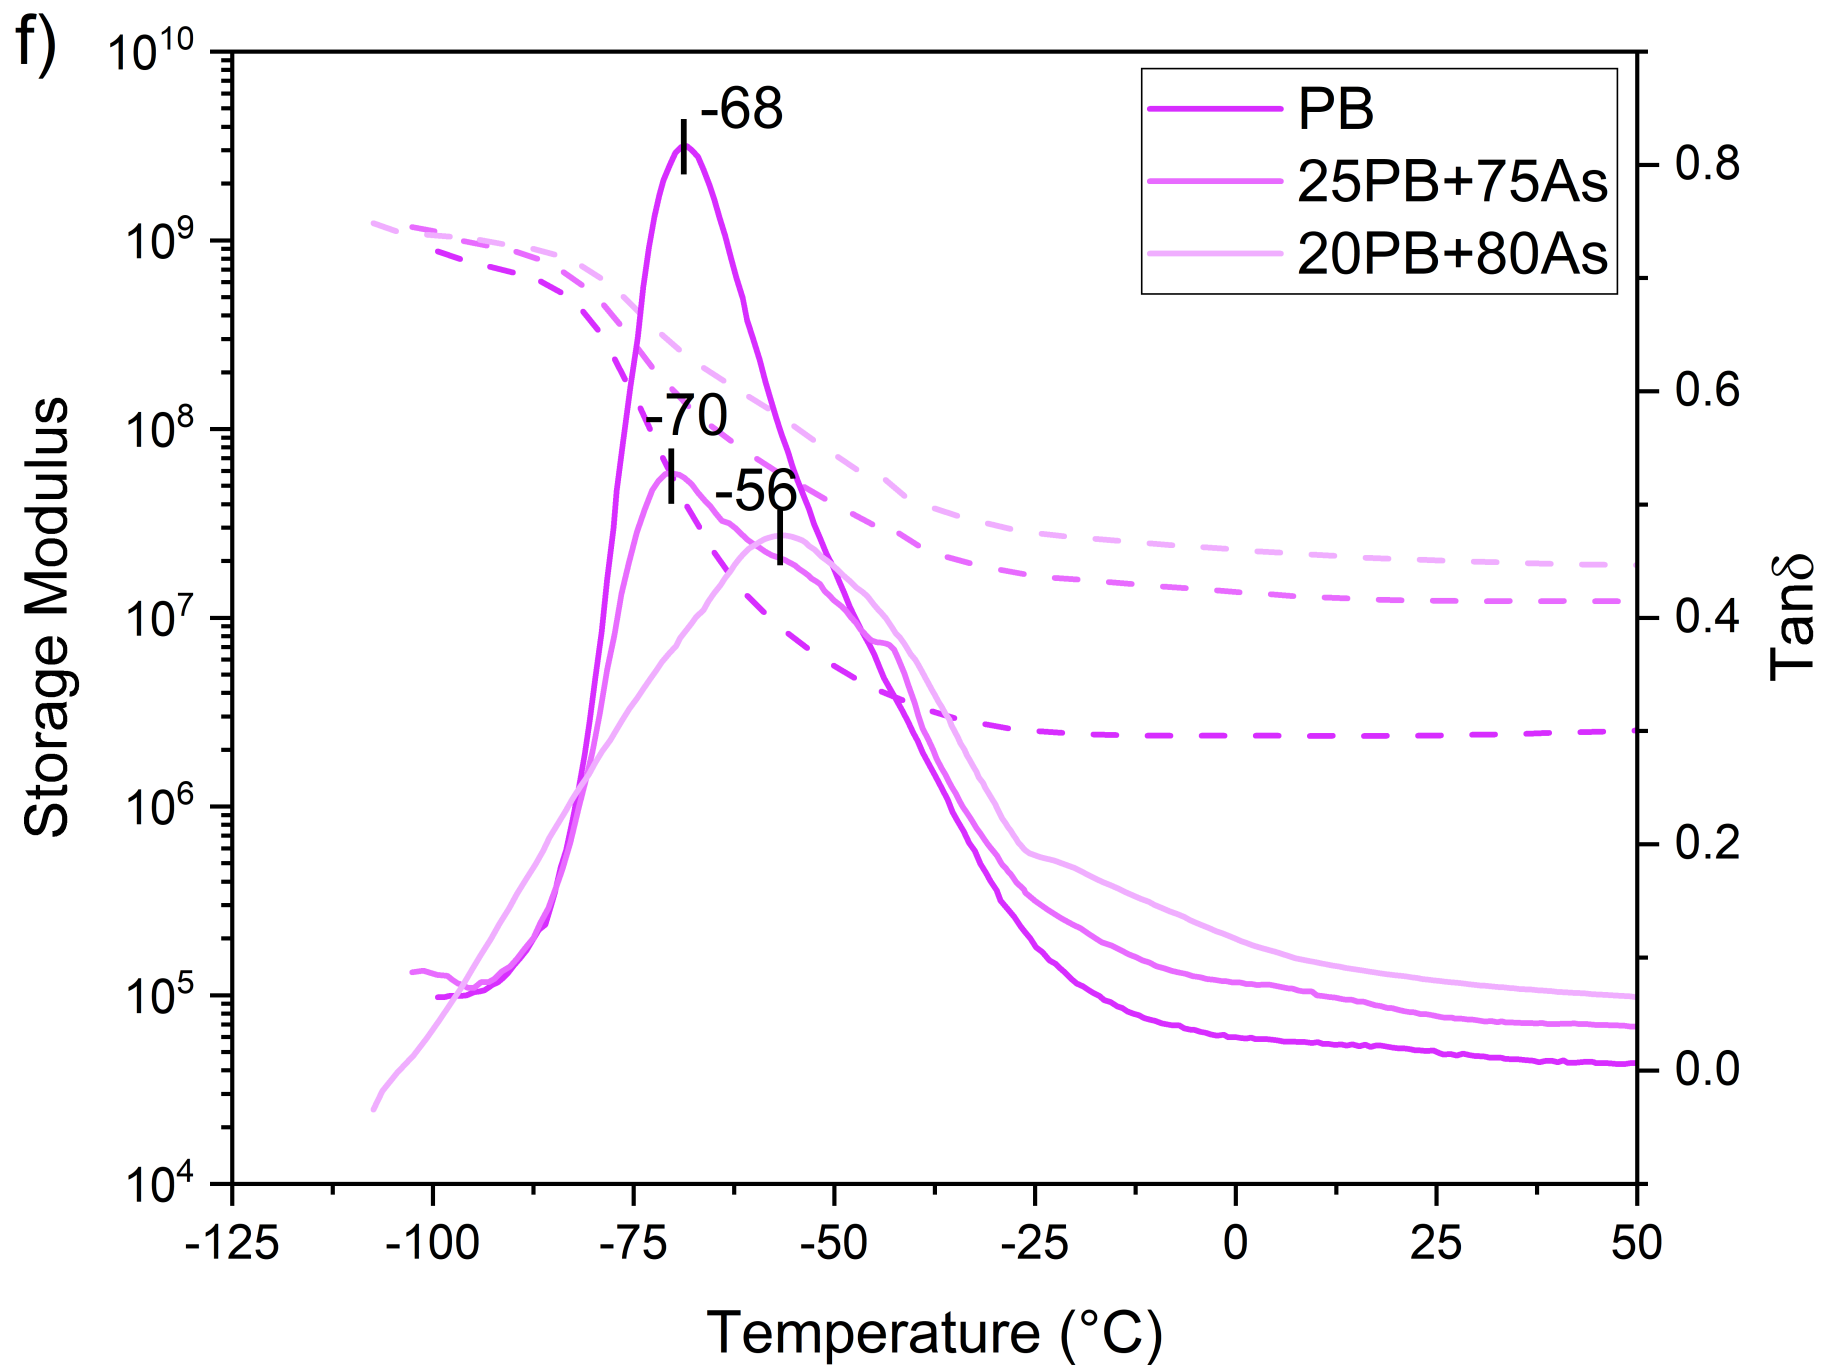

Supplement: s1 [file s1]
